1 **An uncanonical transcription factor-DREB2B regulates seed vigor negatively**  
2 **through ABA pathway**

3 **Running title: DREB2B regulates seed vigor negatively by ABA**

4 Faiza Ali<sup>1,2#</sup>, Zhenzhen Wei<sup>1#</sup>, Yonghui Li<sup>1</sup>, Lei Gan<sup>1</sup>, Zuoren Yang<sup>1,2</sup>, Fuguang Li<sup>1,2\*</sup>, Zhi  
5 Wang<sup>1,2\*</sup>

6 <sup>1</sup>Zhengzhou Research Base, State Key Laboratory of Cotton Biology, Zhengzhou University,  
7 Zhengzhou, 450001, China

8 <sup>2</sup>State Key Laboratory of Cotton Biology, Key Laboratory of Biological and Genetic Breeding  
9 of Cotton, Institute of Cotton Research, Chinese Academy of Agricultural Sciences, Anyang,  
10 455000, China

11 #, These authors contributed equally to this work

12 **\*Correspondence:**

13 Fuguang Li, aylifug@caas.cn;

14 Zhi Wang, wangzhi01@caas.cn

15 **Highlights**

16 DREB2B transcription is seed specific and a negative regulator of seed vigor by ABA-mediated  
17 pathway, which interacts with RCD1s, and functions synergistically with ABI3 to affect seed  
18 germination and vigor in Arabidopsis and cotton.

19 **Abstract**

20 Seed vigor is an important trait for ecology, agronomy, and economy and varies with different  
21 plant species and environmental conditions. Dehydration-Responsive Element-Binding Protein  
22 2B (DREB2B), a subgroup of the DREB transcription factor family, is well-known in drought  
23 resistance. However, the role of *DREB2B* in the regulation of seed vigor has not been identified.

24 Here, we found that *DREB2B* is a negative regulator of seed vigor by ABA-mediated pathway in  
25 *Arabidopsis* with loss of function mutant and over-expressed transgenic lines. Furthermore,  
26 *DREB2B* showed epistatic and parallel to *ABI3* simultaneously in seed vigor regulation by  
27 genetic and molecular approaches. *DREB2B* homolog gene (*GhDREB2B-A09*) was also  
28 identified in cotton. The expression analysis indicated that transcripts of *DREB2B* were higher in  
29 mature dry seed, and the transgenic plants showed the conservative roles of *DREB2B* in  
30 *Arabidopsis* and cotton. In addition, we identified that *DREB2B* interacted with RADICAL-  
31 INDUCED CELL DEATH1 (RCD1) to involve seed vigor regulation together in *Arabidopsis*  
32 and cotton with BiFC experiment and mutant phenotypic analysis. Collectively it is concluded  
33 that *DREB2B* interacting with RCD1 or SRO1 function at upstream of and synergistic with *ABI3*  
34 to regulate seed vigor negatively in *Arabidopsis* and cotton, which provides novel knowledge in  
35 the seed development study.

36 **Keywords:** DREB transcription factor, seed germination, seed vigor, tetrazolium, Abscisic acid,  
37 Controlled Deterioration Test.

## 38 **Introduction**

39 Ecologically, the seed is an essential tissue for their survival, diffusion, and initiation of the  
40 succeeding generation in plant species (Koornneef *et al.*, 2002). Seed longevity determined by  
41 seed vigor is a quantitative trait defined as the period of seed dry storage in which the seed does  
42 not lose its viability and remains capable to germinate after maturation (Angelovici *et al.*, 2010;  
43 Bartee and Krieg, 1974). It is gradually established during seed development and is necessary for  
44 plant survival during unfavorable conditions. However, it decreases with the seed storage life  
45 span in dry storage conditions (Abdelmagid and Osman, 1975; Jing-bao *et al.*, 2011) and might  
46 be affected by temperature and moisture content in many species (Bailly *et al.*, 2004). Therefore  
47 besides natural aging, artificial accelerated aging in which seeds are stored at a higher  
48 temperature and moisture conditions, is used to determine seed longevity (Oracz *et al.*, 2007;  
49 Yamaguchi *et al.*, 2007) and known as “Controlled Deterioration Treatment (CDT)” or  
50 “Accelerated Aging” in the field of seed longevity search (Chen *et al.*, 2016; Hay *et al.*, 2019).

51 Abscisic acid (ABA) shows significant functions in plant development including seed dormancy  
52 and germination, primary root growth, seedling development, reproductive growth, and response  
53 to abiotic stresses (Lovegrove and Hooley, 2000; Razem *et al.*, 2006; Shu *et al.*, 2013). In a

54 study, ABA also showed an important role in seed vigor and longevity (Dekkers *et al.*, 2016). In  
55 addition, mutations in many *Arabidopsis* genes involved in ABA biosynthesis and signaling  
56 pathway controlling seed maturation and dormancy led to a reduction in seed vigor and viability  
57 such as *lec1-3*, *aba1-5*, *abi3-1*, *abi3-5*, and *abi3-7* mutants, which showed significantly shorter  
58 longevity and lower vigor under ambient storage conditions (Cantoro *et al.*, 2013; Hu *et al.*,  
59 2017; Liu *et al.*, 2013; Ravindran *et al.*, 2017; Sugliani *et al.*, 2009). Moreover, *ABI3* plays a  
60 central role upstream of heat shock transcription factor HSFA9 to involve seed longevity and  
61 vigor control in *Arabidopsis* (Kotak *et al.*, 2007; Sano *et al.*, 2016; Tejedor-Cano *et al.*, 2010).

62 Dehydration-Responsive Element-Binding Protein 2B (DREB2B) is a member of the DREB2  
63 transcription factor family belonging to the subfamily of Ethylene-responsive element-binding  
64 proteins (EREBP) TF family (Okamuro *et al.*, 1997; Sakuma *et al.*, 2002; Weigel, 1995).  
65 *DREB2B* encodes *DRE/CRT* (one of the major *cis*-acting elements function in ABA-responsive  
66 or non-responsive gene expression during abiotic stresses) -binding protein *DRE/CRT* (Liu *et al.*,  
67 1998; Nakashima and Yamaguchi-Shinozaki, 2010). The *DREB2B* gene was identified as a key  
68 transcription factor that functions particularly in dehydration and heat stress response (Liu *et al.*,  
69 1998). However, the role of DREB2B related to seed vigor and longevity is unknown. Here, the  
70 higher seed germination rate, stronger seed vigor, and longevity, and reduced germination  
71 sensitivity to ABA of *dre2b* knockout mutant illustrated that *DREB2B* is a negative regulator in  
72 seed vigor and longevity by ABA-mediated pathway. Genetic analysis showed that DREB2B  
73 function epistatic and synergistic with *ABI3* to involve seed vigor through different pathways.  
74 Besides, it is suggested that DREB2B interacted with RCD1 family proteins to form a complex  
75 to negatively control seed vigor in *Arabidopsis* and cotton.

## 76 **Materials and Methods**

### 77 **Genetic materials and growth conditions**

78 The *dre2b* (SALK\_102687C), *abi3-16* (SALK\_023411C), *rcd1-3* (SALK\_116432), *sro1-1*  
79 (SALK\_074525), *sro1-2* (SALK\_126383) mutants were got from the Arabidopsis Biological  
80 Resource Center (ABRC) and belong to Columbia-0 (Col-0) background as well as Col-0 wild  
81 type (WT) was used as a control for all experiments (Supplementary Table S1). *rcd1-3*, and  
82 *sro1-1* mutants were identified as before (Jaspers *et al.*, 2009). *dre2b/abi3-16* double mutant  
83 was acquired by crossing the single homozygous *dre2b* and *abi3-16* mutants. All homozygous

84 single and double mutant lines were isolated by PCR-based screening using gene-specific  
85 (LP/RP) and T-DNA (BP/RP) primers of respective mutant lines obtained from Salk Institute  
86 Genomic Analysis Laboratory (SIGnAL) database (Supplementary Table S2). PCR was done  
87 with 35 cycles stand on the primers' annealing temperature.

88 WT, mutants, and double mutant seeds were surface sterilized for 15-mins in 10% bleach and  
89 washed at least five times with double distilled water. Sterilized seeds were kept for 72 h at 4°C  
90 in dark for stratification and sown on ½MS medium at 22°C, with 16h light/8h dark photoperiod.  
91 15-days old seedlings were moved to soil and grown in a growth chamber at 22°C. Seeds used in  
92 experiments were reaped and placed under dry conditions at 25°C.

### 93 **Germination analysis**

94 To determine the germination ratio, seed vigor, and sensitivity to ABA and PAC, seeds were  
95 collected from WT and mutant plants of different genotypes grown simultaneously and stored  
96 under the same conditions. For germination and seed vigor tests, seeds from all genotypes were  
97 spread on filter paper moistened with distilled water in 5cm Petri dishes; while, for ABA and  
98 PAC sensitivity, all lines were soaked on filter paper with mock solutions or solutions enriched  
99 with ABA and PAC concentration in Petri dishes, and all germination analysis was performed as  
100 described previously (Bentsink *et al.*, 2006).

### 101 **Controlled Deterioration Test (CDT)**

102 CDT was performed as described previously with minor modifications (Liu *et al.*, 2015;  
103 Yamaguchi *et al.*, 2007). Mutants and WT seeds were harvested at the same time, dried, and then  
104 stored under the same conditions two weeks earlier to the experiment. The seeds were stored in a  
105 closed glass container saturated with KCl solution to provide 82% relative humidity (RH) for 3-  
106 days at room temperature for equilibration. After equilibration, the seeds were stored at 42°C  
107 with 82% relative humidity (RH) in a temperature and humidity controlled incubator for 3-, 5-  
108 and 7-days. After CDT treatment seeds were dried at room temperature for two days and tested  
109 for germination as described previously or other determination (Bentsink *et al.*, 2006).

### 110 **Tetrazolium assay for seed viability**

111 Tetrazolium assay was performed as described in an online published protocol with little  
112 modification (Rajjou *et al.*, 2008; Verma *et al.*, 2013). With or without CDT treated seeds were

113 initially surface sterilized with 10% hypochlorous acid (having 0.1% Triton X-100) for 15  
114 minutes and washed five times with sterilized distilled water. After that seeds were soaked in 1%  
115 tetrazolium solution (pH-7.0) at 30°C in darkness for 2 days. After staining seeds were washed  
116 three times with sterilized distilled water. Seeds viability was determined by investigating the  
117 color intensity and staining pattern. Viable seeds turned to red, while non-viable or dead seeds  
118 stayed unstained.

### 119 **Gene identification and bioinformatics analysis**

120 For the identification of *DREB2B* gene homolog in cotton (*G. hirsutum*), the *Arabidopsis*  
121 *DREB2B* (AT3G11020.1) gene was used as query and its homolog gene was identified in *G.*  
122 *hirsutum* (NAU, version 1.1) via BLAST search, and protein sequences were further verified by  
123 hidden Markov model (HMM) as described previously (Faiza *et al.*, 2019; QANMBER *et al.*,  
124 2018). As a result, *Gh\_A09G2423* was identified as its closest homolog which was named  
125 *GhDREB2B-A09*. For alignment, firstly, multiple sequence alignment was created in Clustal X  
126 2.0 (<http://www.clustal.org/clustal2/>) and alignment was visualized by online tool ESPript  
127 (<http://esript.ibcp.fr/ESPript/cgi-bin/ESPript.cgi>). The phylogenetic tree was created through  
128 MEGA 7.0 (Kumar *et al.*, 2016) using the neighbor-joining (NJ) method with 1000 bootstrap  
129 replicates with 50% cutoff values as described previously (Qanmber *et al.*, 2019c). Domain  
130 prediction was carried out by Interproscan 63.0 (<http://www.ebi.ac.uk/InterProScan/>) and  
131 SMART (<http://smart.embl-heidelberg.de/>) search. For promoter *cis*-element analysis, 2kb  
132 upstream of the start codon was subjected to PlantCARE (Ghaderi-Far *et al.*, 2012) database and  
133 the figure was generated using TBtools (Forman and Jensen, 1965).

### 134 **Expression analysis**

135 To determine gene expression in different developmental stages, tissues such as root, stem, leaf,  
136 flower, siliques at 3, 6, 9, 12, 15, 18 days after pollination (DAP), and mature seeds, were  
137 collected from *Arabidopsis* plant grown under normal growth conditions. To collect siliques at  
138 different developmental stages, blooming flowers were first marked by tying with cotton threads  
139 on the day of pollination, and then siliques were collected on a required day after pollination.  
140 Further, cotton tissues were also collected at different developmental stages including root, stem,  
141 leaf, flower, ovules of -2, 0, 3, 5, 10, 15, 20, and 25 DPA (day post-anthesis) as well as fiber  
142 tissues of 1, 10, 15, and 20 DPA, and mature seed from ZM24 (CCR124) cotton plant, grown

143 under field conditions in Zhengzhou China (Yang *et al.*, 2019; Yang *et al.*, 2014). To collect  
144 imbibed seeds, seeds were imbibed in double-distilled water and kept at room temperature, and  
145 collected after different hour intervals (2, 6, 12, 18, and 24 h).

146 The total RNA from all collected tissues was isolated using RNAPrep Pure Plant Kit  
147 (TIANGEN, Beijing, China), as per the manufacturer's instructions. For complementary strand  
148 (cDNA) synthesis and PCR amplification, Prime Script® RT reagent kit (Takara, Dalian, China)  
149 and SYBR Premix Ex Taq™ II (Takara) was used (Qanmber *et al.*, 2019a). *ACTIN2*  
150 (*At3G18780.1*) (Wang *et al.*, 2013) and *GhHis3* (AF024716) (Wan *et al.*, 2016) were used as a  
151 control for *Arabidopsis* and cotton respectively and PCR was performed with three independent  
152 biological replicates. The relative expression values were calculated and used to draw the figures  
153 as described before (Ali *et al.*, 2020; Qanmber *et al.*, 2019b).

154 To evaluate the mRNA level of ABA biosynthesis, signaling and catabolism genes in *dreb2b*  
155 mutant dry seeds and mRNA level of *DREB2B*, *ABI3*, *RCD1*, and *SRO1* in *dreb2b*, *abi3-16*,  
156 *rcd1-3*, *sro1-1*, *dreb2b/abi3-16*, *snl1snl2-1* mutants, the RNA was extracted from freshly  
157 harvested WT and mutant seeds as described above. The primers used for qRT-PCR in this study  
158 were enlisted in Supplementary Table S2.

### 159 **Plasmid construction**

160 For plasmids construction, the full-length coding region and 1.6 and 1.8 promoter fragments of  
161 *DREB2B* and *GhDREB2B-A09* were amplified from *Arabidopsis* and ZM24 seeds cDNA and  
162 DNA respectively using high-fidelity DNA polymerase. The amplified CDS were then fused  
163 with pCAMBIA-2300 containing GFP-tag for over-expression and complementary lines as well  
164 as subcellular localization analysis, under the control of 35S constitutive promoter; By gateway  
165 technology, the CDS were also transferred to pAS2-attR containing GAL4 binding domain for  
166 transcriptional activity. The promoters were fused into pBI121 (K, 2007) containing the GUS  
167 gene for promoter-GUS activity analysis. The primers used for amplification of genes coding  
168 regions and promoter were enlisted in supplementary Table S2.

### 169 **Transformation**

170 The fusion genes for over-expression, promoter-GUS activity, and complementation were then  
171 individually introduced into Col-0 and *dreb2b* mutant plants respectively via the floral dip

172 method (Zheng *et al.*, 2020) with *Agrobacterium tumefaciens* strain (GV3101). After that  
173 harvested seeds were surface sterilized as described above. Positive lines were selected on ½MS  
174 medium plates holding kanamycin (50 mg/L) incubated under 16 h / light and 8 h / dark cycle at  
175 22°C. The 3:1 segregating transformants lines were selected on MS medium and further verified  
176 by PCR. T3 or T4 homozygous transgenic plants were used for analyses.

### 177 **Transcriptional activity assay**

178 To examine the transcriptional activity, fusion constructs of *pBD-DREB2B* and *pBD-*  
179 *GhDREB2B-A09* were individually introduced into Y2H-Gold yeast cells and spread on a  
180 medium plate lacking Trp, incubated at 28°C for 2-4 days. The positive colonies were cultured in  
181 an SD/-Trp liquid medium to OD600 of approximately 1, then the culture was diluted 10 to 100  
182 times with fresh medium and grown further on three selected medium plates such as SD/-Trp,  
183 SD/-Trp-His, and SD/-Trp-His+x-α-gal at 28°C for 2-4 days. The transcriptional activity on three  
184 selected medium plates was observed and images were captured with a digital camera (Canon).

185 For β-galactosidase assay constructs were processed according to the instructions of the β-  
186 galactosidase assay kit provided by Clontech. For each construct, five colonies were assayed and  
187 β-galactosidase activity was expressed in miller units.

### 188 **Subcellular localization and GUS staining**

189 For protein localization, tobacco (*Nicotiana benthamiana*) leaves were co-infiltrated with the  
190 *Agrobacterium* strains (GV3101) containing the *35S:DREB2B-GFP* and *35S:GhDREB2B-A09-*  
191 *GFP* construct along with p19 (Smith, 1995). The infiltrated plants were kept in dark for 24 h  
192 and then in light for 48 h. The protein localization images from tobacco epidermal cells were  
193 obtained with a fluorescence microscope (Olympus) after 72 h of infiltration.

194 To verify the transient expression, protein localization was determined in root and radical cells of  
195 homozygous *35S:DREB2B* and *35S:GhDREB2B-A09* lines at T4 generation. 15-days old  
196 seedlings and radical cells after 24 h imbibitions were used to detect the GFP fluorescence with  
197 1μg/mL-14', 6-diamidino-2-phenylindole (DAPI) (cell nuclei staining dye) (Sigma-Aldrich),  
198 and images from the root and radical cells were obtained with a fluorescence microscope  
199 (Olympus).



200 To determine the tissue-specific localization, freshly collected seedlings and tissues from T4  
201 transgenic plants of pBI121-promoter were incubated into GUS solution (Yuan Ye, Shang Hai)  
202 at 37°C overnight according to the manufacturer's instructions. After staining, samples were  
203 rinsed 3 to 4 times with 70% ethanol and images were captured with a stereo-microscope.

#### 204 **Bimolecular fluorescence complementation (BiFC)**

205 Firstly, the potential interaction factors of DREB2B and GhDREB2B-A09 were predicted by the  
206 online prediction tools Arabidopsis eFP Browser (<http://bar.utoronto.ca/efp/cgi-bin/efpWeb.cgi>)  
207 and ccNET (<http://structuralbiology.cau.edu.cn/gossypium/cytoscape/network.php>) (Turley and  
208 Chapman, 2009) respectively. The predicted interactions between DREB2B and RCD1 or SRO1  
209 were further verified by BiFC. First, the full-length coding regions of *DREB2B*, *RCD1*, *SRO1*,  
210 *DREB2BL-A09*, *GhRCD1L-A05*, *GhRCD1L-D05*, *GhRCD1L-A08*, *GhRCD1L-D12*, and  
211 *GhRCD1L-A12* were amplified from *Arabidopsis* and cotton cDNA (Supplementary Table S2).  
212 The amplified fragments were then cloned into vectors *pXY104* and *pXY106*, prepared *nYFP-*  
213 *DREB2B*, *nYFP-DREB2BL-A09*, *cYFP-RCD1*, *cYFP-SRO1*, *cYFP-GhRCD1L-A05*, *cYFP-*  
214 *GhRCD1L-D05*, *cYFP-GhRCD1L-A08*, *cYFP-GhRCD1L-D12*, and *cYFP-GhRCD1L-A12*  
215 constructs were transformed into GV3101 and were co-infiltrated into 5-6 weeks old tobacco  
216 leaves as described above. The YFP fluorescence signals were perceived with a fluorescence  
217 microscope (Olympus).

#### 218 **Results**

##### 219 **DREB2B negatively regulates seed longevity and vigor**

220 Previously, the expression of the *DREB2B* gene was down-regulated in an *snl1snl2-1* double  
221 mutant which showed clearly decreased seed dormancy and longevity phenotypes (Wang *et al.*,  
222 2013), suggesting that *DREB2B* might have functions in seed related traits. To investigate the  
223 role of *DREB2B* in seed related traits, loss of function mutant *dreb2b* with a T-DNA insertion at  
224 513bp in exon was identified as a null mutant (Supplementary Fig. S1A). Firstly, we analyzed  
225 the germination ratio of freshly harvested seeds in both WT and *dreb2b* plants after different  
226 week's intervals. *dreb2b* showed a slightly higher seed germination rate to that of WT within a  
227 short storage period (room temperature) (Supplementary Fig. S1B), indicating the potential role  
228 of *DREB2B* in seed vigor. Further, the percentage of seed germination was measured after 6, 12,  
229 18, and 24 months interval during a longer period of dry storage and showed that *dreb2b* showed



230 significantly higher (63%) seed germination than that of WT (26%) after 24 months of dry  
231 storage (Fig. 1A), which indicated that *DREB2B* might negatively regulate seed longevity.  
232 Additionally, the germination speed of freshly harvested seeds was also examined after two  
233 weeks of dry storage. After 96 h imbibition following stratification, *dreb2b* showed 60%  
234 germination while WT showed 16%. Although, 95% germination of *dreb2b* and WT was  
235 observed at 168 h imbibition respectively (Fig. 1B, C), signifying the quicker seed germination  
236 in *dreb2b* and negative role of *DREB2B* in seed vigor. Moreover, the role of *DREB2B* was  
237 further confirmed by *DREB2B* complementary assays in *35S:DREB2B/dreb2b* lines. The seeds  
238 from two independent complementary lines exhibited a similar germination speed to that of WT  
239 after stratification (Supplementary Fig. S1C, D), which verified the role of *DREB2B* in seed  
240 vigor.

241 Furthermore, the *dreb2b* seed longevity was analyzed by CDT too. The germination ratios were  
242 59% and 83% for WT and *dreb2b* respectively after 3-days CDT treatments. In contrast, the  
243 germination ratio of untreated seeds were 85% and 95% for WT and *dreb2b* respectively (Fig.  
244 1D-F). In addition, tetrazolium staining displayed that seeds of WT and *dreb2b* showed 100%  
245 viability without CDT treatment, whereas, after 3-days CDT treatment, a higher number of alive  
246 seeds in *dreb2b* (42%) mutant than WT (15%) was observed (Fig. 1G, H). CDT treatment and  
247 tetrazolium staining further confirmed the negative role of *DREB2B* in seed vigor and longevity.

#### 248 ***DREB2B* regulates seed vigor and germination dependent on ABA pathway**

249 Abscisic acid (ABA) and gibberellins (GA) are pivotal phytohormones in seed germination and  
250 vigor regulation. To investigate whether *DREB2B* functions in ABA or GA dependent pathway  
251 to direct seed vigor and germination, *dreb2b* seed germination was determined by applying  
252 exogenous ABA and PAC (Pactobutrazol, an inhibitor for GA synthesis). As a result, *dreb2b*  
253 showed increased germination compared to WT with different ABA concentrations (Fig. 2A)  
254 suggesting the hyposensitivity of *dreb2b* for ABA. However, after PAC treatment *dreb2b*  
255 showed similar germination to that of control (WT) (Supplementary Fig. S2A). These results  
256 pointed out that *DREB2B* may be involved in the ABA-mediated pathway to negatively regulate  
257 seed germination and vigor.

258 Many genetic studies indicated that the ABA metabolism and signaling genes are important in  
259 the regulation of seed germination (Finkelstein *et al.*, 2002; Matilla *et al.*, 2015; Nambara *et al.*,

260 2010; Sun, 2008). Thus, the expressions of key genes such as *NCED4*, *ABI3*, *CYP707A1*, and  
261 *CYP707A2* were analyzed in the *dreb2b* mutant. The result showed that the expressions of *ABI3*  
262 and *CYP707A1* were significantly down-regulated and up-regulated in *dreb2b* mutant  
263 respectively (Fig. 2B) indicating that *DREB2B* might regulate seed germination and vigor by  
264 regulating the *ABI3* involved ABA signaling positively and *CYP707A1* mediated ABA  
265 hydrolysis negatively.

### 266 **DREB2B functions upstream of and synergistically with ABI3 to involve seed vigor** 267 **regulation**

268 *ABI3* is a key regulator in the ABA signaling pathway, positively controlling the seed longevity  
269 and the seed dormancy (Finkelstein *et al.*, 2008; Hu *et al.*, 2017; Yamaguchi *et al.*, 2007). Here,  
270 we identified the clearly decreased transcription of *ABI3* in *dreb2b* (Fig. 2B). Moreover, the  
271 *DREB2B* transcript level in *abi3-16* mutant seeds was almost the same as in WT (Supplementary  
272 Fig S2B). To further explore the relationship between *DREB2B* and *ABI3*, *dreb2b/abi3-16*  
273 double mutant was generated and the expression of both genes (*DREB2B* and *ABI3*) was  
274 assessed by qRT-PCR. Significantly down-regulated expression of *DREB2B* and *ABI3* in  
275 *dreb2b/abi3-16* elucidating that *dreb2b/abi3-16* is a loss of function double mutant of both genes  
276 (Supplementary Fig S2C). Additionally, the up-regulated expression of *DREB2B* with different  
277 ABA concentrations indicated that *DREB2B* is induced more significantly than *ABI3* by ABA  
278 (Supplementary Fig S2D). To deeply investigate the correlation between *DREB2B* and *ABI3* in  
279 the regulation of seed germination and vigor, germination speed was analyzed in freshly  
280 harvested seeds for *dreb2b/abi3-16* double mutant, *dreb2b*, *abi3-16* single mutants, and WT.  
281 Similar early germination was observed in both single mutants (*dreb2b* and *abi3-16*), while  
282 *dreb2b/abi3-16* showed more quick germination (89%) than single mutants and WT (Fig. 2C, D),  
283 which indicated that *DREB2B* may be negatively involved in seed germination synergistically  
284 with *ABI3*. *dreb2b/abi3-16* seed longevity and viability was further determined by different days  
285 (0, 3, 5, and 7) CDT treatments. After 3, 5, and 7-days CDT, germination and viability were  
286 significantly reduced in all genotypes, and the *abi3-16* was arrested most severely, whose  
287 germination decreased to 23% just after 3-days CDT and completely loosed seed viability after  
288 5-days CDT supporting the previous report (Clerkx *et al.*, 2004; Sugliani *et al.*, 2009); *dreb2b*  
289 was less affected by CDT compared to *abi3-16* and WT and loosed its viability until 7-days CDT  
290 same as WT. Whereas, germination of *dreb2b/abi3-16* were 80%, 45%, and 22% after 3, 5, and

291 7-days CDT treatments, respectively; in addition, it showed 12% viable seeds even after 7-days  
292 CDT which is significantly higher than other lines (Fig. 2E-H).

293 Summarily, the *abi3-16* mutation in *dreb2b* increased the seed germination and vigor  
294 significantly, suggest that ABI3 and DREB2B are involved in seed germination and vigor  
295 additively and synergistically. Combing the seed germination and gene expression analysis, it  
296 indicated that DREB2B might function upstream of and synergistic with ABI3 in seed  
297 germination and vigor regulation through different pathways.

### 298 ***DREB2B* transcription is seed-specific in Arabidopsis and cotton**

299 Cotton is a kind of important cash crop, the uniform and quick germination of cotton seed are  
300 vital for its quality and yield. So, *DREB2B* homolog genes were identified in *G. arboreum*, *G.*  
301 *hirsutum*, *G. barbadense*, *G. raimondii*, *Z. may*, and *O. sativa* to explore the potential functional  
302 genes in seed vigor regulation of cotton. A total of ten *DREB2B* homologous genes (Six in cotton,  
303 two in maize, and two in rice) were identified and a phylogenetic tree was constructed with a  
304 maximum similarity matrix. The result illustrated the maximum similarity of *DREB2B* with  
305 *Gh\_A09G2423*, which was studied in our research and renamed as *GhDREB2B-A09* (Fig. 3A).  
306 Further protein sequence analysis indicated that both *Arabidopsis* and cotton *DREB2Bs*  
307 (*DREB2B* and *GhDREB2B-A09* respectively) show the low identity of amino acids with  
308 conserved AP2 domains and low complexity regions (LC) (Supplementary Fig. S3A, B).

309 Furthermore, the expression patterns of *DREB2B* and *GhDREB2B-A09* were examined by qRT-  
310 PCR in different developmental tissues and imbibed seeds. The results showed that *DREB2B* and  
311 *GhDREB2B-A09* were preferentially expressed in the mature seed as compared to other tissues  
312 (Fig. 3B, C). In imbibed seeds, the transcript level of *DREB2B* was up-regulated gradually and  
313 reach a peak until 6 h after imbibition, after that it was down-regulated to the level of dry seed;  
314 while the transcript level of *GhDREB2B-A09* was equally in dry seeds and at 6 h imbibition, and  
315 decreased clearly in other imbibition time points detected (Fig. 3D). These results suggested that  
316 *DREB2B* and *GhDREB2B-A09* may share some conserved role partially in seed germination and  
317 vigor, the difference in expression profiles of both also indicated potential functional  
318 differentiation of *DREB2B* in *Arabidopsis* and cotton corresponding with their different amino  
319 acid sequences.

### 320 **Transcriptional activity of *DREB2B* in Arabidopsis and cotton**

321 Both DREB2B and GhDREB2B-A09 belongs to the AP2 domain transcription factor family.  
322 Therefore, their transcriptional activity was tested by a yeast assay system as described in  
323 “Materials and Methods” section. Both transcription factors showed obvious transcriptional  
324 activity than the control, and the GhDREB2B-A09 acquired higher transcriptional activity than  
325 DREB2B (Fig. 3E). Furthermore, the transcriptional activity was also confirmed by  $\beta$ -  
326 galactosidase assay and the results agreed with the yeast assay (Fig. 3F). Collectively, these  
327 results illustrated and confirmed the transcriptional activity of both transcription factors from two  
328 different species (*Arabidopsis* and *G. hirsutum*).

### 329 **DREB2Bs localization in different sub-cellular or tissue level**

330 To further investigate the mechanisms of DREB2Bs, the transient expression of DREB2B and  
331 GhDREB2B-A09 at the sub-cellular level was determined in epidermal cells of tobacco leaves  
332 and fusion proteins green fluorescent signals were detected in the membrane and cytoplasm (Fig.  
333 4A).

334 To verify this type of localization in the cytoplasm instead of the nucleus, the 15-days old  
335 seedlings root cells of over-expressed *DREB2B-GFP* and *GhDREB2B-A09-GFP* transgenic  
336 plants at T4 generation were examined again. The green fluorescent signals in young seedlings’  
337 root cells were also detected in the cytoplasm and membrane (Fig. 4B). Furthermore, the  
338 cytoplasm localization was also confirmed by detecting green fluorescent signals with DAPI  
339 staining in the radical cells of transgenic plant seeds after 24 h imbibition (Fig. 4C). In  
340 combination, these results proved and authenticated the multiple sub-cellular localizations (e.g.  
341 cytoplasm, membrane) of DREB2B and GhDREB2B-A09.

342 Further, 2KB promoter sequences of *DREB2B* and *GhDREB2B-A09* from the translational start  
343 site (TSS) was used for promoter *cis*-elements analysis which showed that both genes contained  
344 hormones (MeJA, salicylic acid, gibberellin, auxin, and abscisic acid), light, defense and  
345 stressed, plant growth and development (endosperm and meristem expression) responsive and  
346 MYBHv1 binding sites related *cis*-elements in their promoter region (Supplementary Fig. S3C).  
347 Then, promoter activities of *DREB2B* and *GhDREB2B-A09* at T4 generation were investigated in  
348 all vegetative and reproductive stages by histochemical GUS staining. *DREB2B* and  
349 *GhDREB2B-A09* showed strong promoter activity in almost all vegetative and reproductive  
350 tissues such as in young seedlings, shoot, root, leaf, shoot and root initiation point, root tip, root

351 hair, secondary root, anther, petals, and stigma (Fig. 4D-Y) respectively, indicating the similar  
352 and constitutive function of both genes in seedling and reproductive organs development of the  
353 plant.

#### 354 **Over-expression of DREB2B and GhDREB2B-A09 reduce seed vigor**

355 To deeply investigate the role of *DREB2B* in seed germination and vigor of Arabidopsis and  
356 cotton, *DREB2B* and *GhDREB2B-A09* over-expression lines (*35S:DREB2B* and  
357 *35S:GhDREB2B-A09*) were generated. qRT-PCR results showed a significantly higher  
358 expression of *DREB2B* and *GhDREB2B-A09* in over-expression lines of both genes, respectively  
359 (Supplementary Fig. S4A, B). Moreover, the upregulated expression of *ABI3* in *35S:DREB2B*  
360 lines elucidating that *ABI3* is regulated by *DREB2B* at least partially to involve the regulation of  
361 seed germination and vigor.

362 Further, germination speed of *35S:DREB2B* and *35S:GhDREB2B-A09* lines, mutant and WT  
363 were tested. The germination of *dreb2b* was earlier than WT, while *35S:DREB2B* and  
364 *35S:GhDREB2B-A09* lines showed delayed germination compared to WT at 96 and 120 h  
365 imbibition. The *dreb2b* mutant seeds rapidly started to germinate and the germination rate  
366 reached over 60% and 80% at 96 h and 120 h imbibition respectively. WT seeds began to  
367 germinate later and reached about 10% and 65% germination rate at 96 h and 120 h respectively,  
368 while the *35S:DREB2B* and *35S:GhDREB2B-A09* lines began to germinate at 96 h and reached  
369 about 35% germination rates at 120 h. Moreover, two *DREB2B* complementary lines exhibited a  
370 similar seed germination speed to that of WT. The above results validated the conservative and  
371 negative relationship between seed germination and *DREB2B* expression in Arabidopsis and  
372 cotton (Fig. 5A, B).

373 In turn, CDT assay also was used to confirm the seed vigor and viability of *35S:DREB2B* and  
374 *35S:GhDREB2B-A09* lines. After 3-days CDT treatment, seeds of all the genotypes exhibited  
375 some delay in germination compared with mock; while *dreb2b* mutant seeds showed a relatively  
376 lower sensitivity, and *35S:DREB2B* and *35S:GhDREB2B-A09* lines showed higher sensitivity, as  
377 compared with WT (Fig. 5C, D). The germination ratio was 40% and 17-19% for *35S:DREB2B*  
378 and *35S:GhDREB2B-A09* lines respectively, whereas WT and *dreb2b* showed 60% and 81%  
379 germination at 7-days imbibition respectively. A tetrazolium assay after 3-day CDT treatment  
380 showed that viable seeds in *35S:DREB2B* and *35S:GhDREB2B-A09* lines were decreased to a

381 lower ratio 6-13%; while *dreb2b* mutant displayed more viable seeds (42%) compared to WT  
382 (19%) and complementary lines (17-20%) (Supplementary Fig. S4B, C).

### 383 **DREB2B interacts with RCD1 conservatively in Arabidopsis and cotton**

384 The above results showed that DREB2B functions dependent and independent on ABI3 to  
385 mediate the seed vigor, which forwards us to unravel some interacting factors of DREB2B to  
386 understand a more detailed pathway involved by DREB2B in seed vigor. Online prediction  
387 analysis (eFP Browser and ccNET) indicated that DREB2B protein might interact with RCD1  
388 (RADICAL-INDUCED CELL DEATH 1) and SRO1 (SIMILAR TO RCD-ONE 1) in  
389 Arabidopsis and cotton. To confirm that, five homologous RCDs (*GhRCD1L-A05*, *GhRCD1L-*  
390 *D05*, *GhRCD1L-A08*, *GhRCD1L-A12*, and *GhRCD1L-D12*) (Supplementary Table S2) were  
391 identified in cotton and the alignment of the amino acid of total seven RCD1 family proteins  
392 showed the moderate identity among them; then a phylogenetic tree was constructed and  
393 depicted that GhRCD1s in chromosomes A12, D12 and A08 are the more closer homology with  
394 *Arabidopsis* RCD1 and SRO1 (Supplementary Fig. S5A, B). Further analysis indicated that all  
395 RCD1s from *Arabidopsis* and *G. hirsutum* contain WWE domain and other two domains (PARP  
396 and RST), which may contribute to the conserved and physical interaction (Supplementary Fig.  
397 S5C) between DREB2B and RCD1 family genes in the plant.

398 Then, the interaction of DREB2B proteins with RCD1 and SRO1 in *Arabidopsis* and cotton were  
399 subsequently analyzed in *planta* using BiFC. The interaction of Arabidopsis DREB2B with  
400 RCD1 was observed in the membrane and cytoplasm while with SRO1 in the nucleus (Fig. 6A).  
401 However, the interactions of GhDREB2B-A09 with five GhRCD1Ls proteins (GhRCD1L-A05,  
402 GhRCD1L-D05, GhRCD1L-A08, GhRCD1L-A12, and GhRCD1L-D12) were observed in the  
403 membrane and cytoplasm (Fig. 6B). These results were in accordance with the previous study  
404 that *RCD1* and *SRO1* interacted with several transcription factors belonging to the *DREB*  
405 transcription factor family including *DREB2B* and other transcription factor families (Jaspers *et*  
406 *al.*, 2009; Wu *et al.*, 2018). Meantime, the localization difference between the interaction factor  
407 analysis of DREB2B from Arabidopsis and cotton indicated some specificity for the underlying  
408 mechanisms associated with DREB2B in seed vigor regulation of different plant species.

### 409 **RCD1 and SRO1 negatively regulate seed vigor**



410 To investigate the roles of *RCD1* and *SRO1*, transcript levels of them were determined in  
411 different developmental tissues and imbibed seeds of *Arabidopsis* and *G. hirsutum*. *RCD1*  
412 exhibited very higher transcript levels (no less than 200 folds higher compared to other tissues)  
413 in 9, 15, 18 DAP siliques and mature seeds. *SRO1* transcript level was gradually up-regulated  
414 during the late phase of seed development at 15 and 18 DAP siliques and mature seeds similar to  
415 *RCD1* (Fig. 6C). The up-regulated expression of *RCD1* and *SRO1* during seed maturation  
416 indicated that both genes have specified roles during seed maturation. In addition, *RCD1*  
417 exhibited almost the same pattern as that of *DREB2B* in imbibed seeds (Fig. 6D and 3D),  
418 suggesting that *RCD1* might function in seed germination similar to *DREB2B*. However, the  
419 *SRO1* mRNA was down-regulated in imbibed seeds at all-time points (Fig. 6D).

420 In cotton, *GhRCD1L-A05* and *GhRCD1L-D05* showed constitute expression and higher levels in  
421 later developmental ovules; *GhRCD1L-A08*, *GhRCD1L-A12*, and *GhRCD1L-D12* showed  
422 specific expression in the ovules (Fig. 6E, F). While in imbibed seeds, the only expression of  
423 *GhRCD1L-A12* was up-regulated clearly at 18 h imbibition (Fig. 6G). The expression results  
424 indicated that *RCD1* family genes may play redundant and specific roles in seed related traits.

425 To confirm the roles of *RCD1* and *SRO1* in seed germination and vigor, germination speed of  
426 *rcd1-3*, *sro1-1*, and *sro1-2* in freshly harvested seeds was examined at different hour intervals  
427 during imbibition after stratification. *rcd1-3*, *sro1-1*, and *sro1-2* germination were earlier and  
428 completed the 50-60% germination in 96 h after stratification similar to *dreb2b* while only 10%  
429 seed germination was observed in WT (Fig. 7A, B). More than 80% seed germination of *dreb2b*,  
430 *rcd1-3*, *sro1-1*, and *sro1-2* mutants were observed, whereas, WT showed less than 60%  
431 germination after 120 h imbibition. The similar seed germination phenotype of *dreb2b*, *rcd1-3*,  
432 *sro1-1*, and *sro1-2* mutants demonstrated that DREB2B and its interacting proteins (RCD1 and  
433 SRO1) may function through the same pathway to involve seed germination.

434 Furthermore, *rcd1-3*, *sro1-1*, and *sro1-2* mutants showed less sensitivity to CDT compared to  
435 WT similar to *dreb2b*, and germination ratio of treated seeds was 59, 80, 90, 80, and 81% for  
436 WT, *dreb2b*, *rcd1-3*, *sro1-1*, and *sro1-2* respectively after 7-days (Fig. 7C, D) imbibition; all  
437 these lines also showed similar seed germination pattern with above without CDT treatment (Fig.  
438 7E, B). These results confirmed that DREB2B together with RCD1 and SRO1 is playing a  
439 negative role in the regulation of seed vigor and germination.

440 Here *rcd1-3*, *sro1-1*, and *sro1-2* mutants showed similar seed vigor and germination phenotype  
441 to *dreb2b* and confirmed that *DREB2B* works together with *RCD1* and *SRO1* to negatively  
442 involve seed vigor and germination regulation. Hence, to further confirm the correlation between  
443 *DREB2B* and its interacting proteins (*RCD1* and *SRO1*), the expression of *RCD1* and *SRO1* in  
444 *dreb2b*, *abi3-16* and *dreb2b/abi3-16* mutant's dry seeds while *DREB2B* and *ABI3* expression in  
445 *rcd1-3*, and *sro1-1* mutant's dry seeds was detected (Supplementary Fig. S6A, B). The  
446 expression analysis exhibited the 0.7 to 0.8 fold down-regulated mRNA level of *RCD1* and  
447 *SRO1* in *dreb2b* and *abi3-16* mutant's dry seeds while their expression was almost completely  
448 down-regulated in *dreb2b/abi3-16* double mutant dry seeds. However, the transcript level of  
449 *DREB2B* and *ABI3* in *rcd1-3*, and *sro1-1* was also down-regulated confirmed that both  
450 interacting proteins (*DREB2B*, *RCD1*, and *SRO1*) positively regulate each other and work  
451 together in the regulation of seed vigor and germination negatively. Besides, the up-regulated  
452 expression of *RCD1* and *SRO1* in response to ABA treatments showed that similar to *DREB2B*  
453 its interacting proteins also induced by ABA and use ABA-mediated pathway for seed vigor and  
454 germination regulation negatively (Supplementary Fig. 6C).

## 455 **Discussion**

### 456 ***DREB2B* plays a negative role in seed germination and vigor**

457 EREBP, a super-family of plant-specific transcription factors, contain a highly conserved AP2  
458 DNA-binding domain (Okamuro *et al.*, 1997; Weigel, 1995), and were classified into subfamilies  
459 DREB, ERF, AP2, RAV, and others based on the number of repetitions and the sequence of the  
460 AP2 domain in *Arabidopsis* (Sakuma *et al.*, 2002). The DREB proteins namely, *DREB1* and  
461 *DREB2* can induce a set of abiotic stress-related genes (Lata and Prasad, 2011). Eight *DREB2*-  
462 type proteins were identified in *Arabidopsis* (Nakashima *et al.*, 2000; Sakuma *et al.*, 2002),  
463 among which *DREB2B* confers various abiotic stress-tolerance in many species (Marcos-Filho,  
464 2015; Pettigrew and Dowd, 2011). Here, a loss of function *dreb2b* mutant was identified and it  
465 exhibited significantly longer seed longevity and quicker germination compared to the WT (Fig.  
466 1A, B, C). Additionally, *dreb2b* mutant showed higher seed germination and more viable seeds  
467 than WT after artificial aging treatment (Fig. 1D-H). These results suggested that the abundance  
468 of *DREB2B* protein in seeds appears to be negatively correlated with seed germination and  
469 longevity.

#### 470 **DREB2B is involved in ABA-dependent pathway partially**

471 ABA is a type of very vital hormone in seed development as well as seed vigor (Dekkers *et al.*,  
472 2016). In our study, it is observed that the absence of DREB2B protein leads to decreased  
473 inhibition of seed germination in response to exogenous ABA, suggesting that *DREB2B* might  
474 function in an ABA-dependent pathway to direct seed germination and vigor. Moreover, the  
475 significantly reduced expression of *ABI3* and higher expression of *CYP707A1* in *dreb2b*  
476 supported that both ABA synthesis and signaling play downstream of DREB2B at least partially  
477 (Fig. 2B, Supplementary Fig. S2B). Collectively, the reduced ABA sensitivity of *dreb2b*,  
478 induced expression of *DREB2B* in response to ABA treatments, and altered expression of ABA  
479 pathway genes all suggested that DREB2B exert roles involved in the ABA pathway to  
480 negatively manage seed germination and vigor (Fig. 2A, B).

#### 481 **DREB2B functions synergistically with ABI3 in seed vigor regulation**

482 *ABI3* is a well-known positive regulator for seed vigor and seed dormancy (Arad *et al.*, 2002;  
483 Ooms *et al.*, 1993), supporting the results in this study (Fig. 2C-H). The down-regulation of *ABI3*  
484 in *dreb2b* and unchanged expression of *DREB2B* in *abi3-16* indicated that *DREB2B* might  
485 function upstream of *ABI3* partially (Fig. 2B, Supplementary Fig. S2B). Moreover, *dreb2b/abi3-*  
486 *16* double mutant exhibited better seed germination and vigor than single mutants (Fig. 2D, F, G)  
487 which indicated that the DREB2B and *ABI3* show synergistic roles in genetic in the seed  
488 germination speed and seed vigor through different pathways. Combining with the expression of  
489 *DREB2B* or *ABI3* in *abi3-16* or *dreb2b* mutants respectively, all these indicated that seed  
490 germination after stratification and seed germination after CDT treatment may not be regulated  
491 by the same pathways, and in these different processes, DREB2B and *ABI3* play roles with an  
492 additive model in part as well as through some different downstream pathways.

#### 493 **Conservative roles of DREB2B in seed vigor of Arabidopsis and cotton**

494 To ask the function of *DREB2B* in cotton seed vigor, *GhDREB2B-A09* was identified as the  
495 homologous gene of *DREB2B* from *G. hirsutum* with the conserved AP domains (Supplementary  
496 Fig. S3A, B). The expression analysis indicated that the higher expression of *DREB2B* and  
497 *GhDREB2B-A09* were detected in mature seed compared to other tissues of plant development.  
498 Moreover, in imbibed seeds, the expression of *DREB2B* and *GhDREB2B-A09* were up-regulated  
499 quickly. The similar higher transcript level in mature seed and during imbibition suggested that

500 *DREB2B* and *GhDREB2B-A09* are playing similar promising roles in seed germination and vigor  
501 (Fig. 3B-D). Besides, transcriptional activity through the yeast system and  $\beta$ -galactosidase assay  
502 illustrated that *DREB2B* and *GhDREB2B-A09* are functional transcription activation factors  
503 (Fig. 3E, F).

504 Next, *35S:DREB2B* and *35S:GhDREB2B-A09* lines showed significantly slow germination speed  
505 (Fig. 5A, B) and drastically reduced seed vigor and viability after CDT treatment compared to  
506 WT, complementary lines, and *dreb2b* (Fig. 5C-E, Supplementary Fig. S4B, C). All these  
507 supported and confirmed that *DREB2B* is negatively involved in seed vigor and germination in  
508 *Arabidopsis* and cotton.

### 509 **How is the biochemical and molecular channels of *DREB2B* in seed germination and vigor** 510 **regulation?**

511 *DREB2B* is involved in multiple abiotic stresses tolerance and seed development. However, its  
512 detailed biochemical and molecular mechanism is still ambiguous. Firstly, we tested the protein  
513 sub-cellular localization. Transient and stable expression analysis of protein localization of  
514 *DREB2B* and *GhDREB2B-A09* authenticated that both *DREB2B* transcription factor proteins  
515 are exclusively localized in cytoplasm and membrane, indicating the different mechanisms of  
516 *DREB2B* from common transcription factors in the nucleus, which also provide some new and  
517 conceivable molecular mechanisms of transcription factors. Both of the promoters-GUS analysis  
518 of *DREB2B* and *GhDREB2B-A09* also showed their similar and constitute expression in plant  
519 development (Fig. 4D-Y), supporting the multiple and conservative roles of *DREB2B* in  
520 *Arabidopsis* and cotton. Second, the interaction factors of *DREB2B* and *GhDREB2B-A09*,  
521 RCD1s were explored and identified by protein interaction software (eFP Browser and ccNET)  
522 and supported the previous study (Wu *et al.*, 2018). Further, BiFC experiments proved the direct  
523 interaction of *DREB2B* and *GhDREB2B-A09* with RCD1s in membrane, cytoplasm, or nucleus,  
524 which indicated the potentially different molecular mechanisms of *DREB2B* associated with  
525 different interacting factors. But it remains to be determined the putative interaction specificity  
526 between two proteins and the biological significance of their interactions. RCD1 belongs to the  
527 (ADP-ribosyl) transferase domain containing subfamily with a WWE protein-protein interaction  
528 domain and acts as an integrative node within different hormonal signaling (e.g. ABA, Ethylene,  
529 JA) and in several stresses responses (e.g. drought, cold) (Ahlfors *et al.*, 2004). In addition, the

530 interaction of RCD1 with other proteins highlighted its different functions. For example, RCD1  
531 interacts with the cytoplasmic tail of Salt Overly Sensitive1 (SOS1) which elucidated the cross-  
532 talk between the ion-homeostasis and oxidative-stress detoxification pathways involved in plant  
533 salt tolerance (Katiyar-Agarwal *et al.*, 2006). In another study, the interaction between  
534 glutathione peroxidase3 and RCD1 was identified which hypothesized that RCD1 could be a  
535 plant equivalent of the yeast redox-regulated transcription factor Yap1 (Miao *et al.*, 2006).  
536 Moreover, previous screening of RCD1 interaction factor by yeast two-hybrid identified several  
537 transcription factors such as DREB2A, DREB2B (Belles-Boix *et al.*, 2000), suggesting that  
538 RCD1 might affect the function or activity of transcription factors to regulate downstream genes,  
539 which also support the interaction between RCD1 and DREB2B in seed development regulation.  
540 Collectively, RCD1 is a multifunctional factor interacting with various proteins, which make it  
541 like an adaptor or post-translational factor involved in the different complex and physiological  
542 pathway, but the detailed mechanisms are unclear.

543 To confirm the physiological roles of RCD1 genes in seed germination and vigor, the  
544 expressions of *RCD1*, *SRO1* were investigated in different developmental tissues and imbibed  
545 seeds of *Arabidopsis* and *G. hirsutum* by qRT-PCR (Fig. 6C-G). The higher transcript of *RCD1*  
546 and *SRO1* during seed maturation and imbibition compared to other tissues indicated their  
547 potential roles during seed development and germination. The similar expression pattern of  
548 *RCD1* family genes and *DREB2B* in developed and imbibed seeds suggested the underlying  
549 interaction between them in seed development and germination. Furthermore, in line with  
550 expectations, *rcd1-3*, *sro1-1*, and *sro1-2* mutants exhibited a quicker germination rate and better  
551 seed vigor same as *dreb2b* (Fig. 7A-E). Additionally, the down-regulated expression of *RCD1*  
552 and *SRO1* in *dreb2b* and *DREB2B* in *rcd1-3* and *sro1-1* further proved their interaction; up-  
553 regulated expression of *RCD1* and *SRO1* in response to ABA similar to DREB2B evidenced the  
554 same pathway involved by them (Supplementary Fig. S6A-C). From these results, it is concluded  
555 that DREB2B and its interacting proteins (RCD1 and SRO1) have a positive correlation with  
556 each other and form complex to regulate seed germination and vigor negatively together via an  
557 ABA-mediated pathway.

558 **Hypothetical model associated with DREB2B in seed vigor/longevity regulation**

559 In a word, we hypothesized a model for DREB2B in seed vigor regulation here (Fig. 8). ABI3 is  
560 an important positive regulator for seed vigor through downstream heat shock factors such as  
561 HsfA9, which is controlled by DREB2B partially. Furthermore, the complex comprising  
562 DREB2B and RCD1s also plays crucial roles synergistically with ABI3 through an unidentified  
563 downstream factor or pathway in seed vigor, which functions downstream of ABA same as ABI3.  
564 To exploring the downstream factors by RNA-Seq, ChIP-Seq et al. approaches would be very  
565 important in the detailed mechanisms involved by DREB2B in seed vigor regulation. A previous  
566 study showed that ROS (reactive oxygen species) change the profile and function of the RCD1  
567 protein. RCD1 interacts and suppresses the activity of the transcription factors ANAC013 and  
568 ANAC017, which mediate a ROS-related retrograde signal originating from mitochondrial  
569 complex III, providing a feedback control on its function (Shapiguzov *et al.*, 2019). These  
570 indicated that RCD1 can modify interacting factors positively or negatively with several different  
571 approaches to mediate downstream pathways. Thus, to reveal the underlying mechanism within  
572 the interaction between DREB2B and RCD1 would provide more interesting and novel clues for  
573 the roles of them. DREB2B showing a non-nuclear localization indicated its special mechanism.  
574 More intensive research such as determination of the structure, transcription activity, and protein  
575 localization of DREB2B before and after interaction with RCD1 family proteins would be  
576 interesting and helpful for the detailed mechanism of DREB2B and RCD1 in seed germination  
577 and vigor. The down-regulated mRNA level of *RCD1* and *SRO1* in *snl1snl2-1* double mutant  
578 like *DREB2B* suggested that *SNL1/2* functions upstream of *DREB2B*, *RCD1*, and *SRO1* in the  
579 regulation of seed germination and vigor through an indirect interaction (Supplementary Fig.  
580 S6D), which shed some light on the regulation between epigenetic and DREB2B-RCD1  
581 complex.

## 582 **Acknowledgement**

583 We thank Xin Li (ICR, CAAS) for the technical support in using confocal microscopy. This  
584 work was supported by grants from the National Natural Science Foundation (31690093), the  
585 Creative Research Groups of China (31621005), and Zhengzhou University (32410196).

## 586 **Author Contribution**



587 ZW and FL conceived and designed the study. ZW and FA performed research; YL, LG, and Z  
588 Y provided reagents and materials; ZW and FA drafted the manuscript. All authors revised and  
589 approved the manuscript.

#### 590 **Data availability statement**

591 All data supporting the findings of this study are available within the paper and within its  
592 supplementary materials published online.

593

#### **References**

**Abdelmagid AS, Osman AM.** 1975. Influence of Storage Period and Temperature on Viability and Chemical Composition of Cotton Seeds. *Annals of Botany* **39**, 237-248.

**Ahlfors R, Lång S, Overmyer K, Jaspers P, Brosché M, Tauriainen A, Kollist H, Tuominen H, Belles-Boix E, Piippo M, Inzé D, Palva ET, Kangasjärvi J.** 2004. Arabidopsis RADICAL-INDUCED CELL DEATH1 Belongs to the WWE Protein-Protein Interaction Domain Protein Family and Modulates Abscisic Acid, Ethylene, and Methyl Jasmonate Responses. *The Plant cell* **16**, 1925.

**Ali F, Qanmber G, Wei Z, Yu D, Li Yh, Gan L, Li F, Wang Z.** 2020. Genome-wide characterization and expression analysis of geranylgeranyl diphosphate synthase genes in cotton (*Gossypium* spp.) in plant development and abiotic stresses. *BMC Genomics* **21**, 561.

**Angelovici R, Galili G, Fernie AR, Fait A.** 2010. Seed desiccation: a bridge between maturation and germination. *Trends in Plant Science* **15**, 211-218.

**Arad M, Benson DW, Perez-Atayde AR, McKenna WJ, Sparks EA, Kanter RJ, McGarry K, Seidman J, Seidman CE.** 2002. Constitutively active AMP kinase mutations cause glycogen storage disease mimicking hypertrophic cardiomyopathy. *The Journal of clinical investigation* **109**, 357-362.

**Bailly C, Leymarie J, Lehner A, Rousseau S, Côme D, Corbineau F.** 2004. Catalase activity and expression in developing sunflower seeds as related to drying. *J Journal of Experimental Botany* **55**, 475-483.

**Bartee SN, Krieg DR.** 1974. Cottonseed Density: Associated Physical and Chemical Properties of 10 Cultivars1. *Agronomy Journal* **66**, 433-435.

- Belles-Boix E, Babiychuk E, Van Montagu M, Inzé D, Kushnir S.** 2000. CEO1, a new protein from *Arabidopsis thaliana*, protects yeast against oxidative damage11CEO1 was deposited in the EMBL databank with the accession number AJ251578. *FEBS Letters* **482**, 19-24.
- Bentsink L, Jowett J, Hanhart CJ, Koornneef M.** 2006. Cloning of DOG1, a quantitative trait locus controlling seed dormancy in *Arabidopsis*. *Proceeding of National Academy of Science U S A* **103**, 17042-17047.
- Cantoro R, Crocco CD, Benech-Arnold RL, Rodríguez MV.** 2013. In vitro binding of *Sorghum bicolor* transcription factors ABI4 and ABI5 to a conserved region of a GA 2-OXIDASE promoter: possible role of this interaction in the expression of seed dormancy. *Journal of Experimental Botany* **64**, 5721-5735.
- Chen HH, Chu P, Zhou YL, Ding Y, Li Y, Liu J, Jiang LW, Huang SZ.** 2016. Ectopic expression of NnPER1, a *Nelumbo nucifera* 1-cysteine peroxiredoxin antioxidant, enhances seed longevity and stress tolerance in *Arabidopsis*. *Plant Journal* **88**, 608-619.
- Clerkx EJM, Blankestijn-De Vries H, Ruys GJ, Groot SPC, Koornneef M.** 2004. Genetic differences in seed longevity of various *Arabidopsis* mutants. *Physiologia Plantarum* **121**, 448-461.
- Dekkers BJW, He H, Hanson J, Willems LAJ, Jamar DCL, Cueff G, Rajjou L, Hilhorst HWM, Bentsink L.** 2016. The *Arabidopsis* DELAY OF GERMINATION 1 gene affects ABSCISIC ACID INSENSITIVE 5 (ABI5) expression and genetically interacts with ABI3 during *Arabidopsis* seed development. *The Plant Journal* **85**, 451-465.
- Faiza A, Qanmber G, Yonghui L, Shuya M, Lili L, Zuoren Y, Zhi W, Fuguang L.** 2019. Genome-wide identification of *Gossypium* INDETERMINATE DOMAIN genes and their expression profiles in ovule development and abiotic stress responses. *Journal of Cotton Research* **2**, 3.
- Finkelstein R, Reeves W, Ariizumi T, Steber C.** 2008. Molecular aspects of seed dormancy. *Annual Review of Plant Biology* **59**, 387-415.
- Finkelstein RR, Gampala SS, Rock CD.** 2002. Abscisic acid signaling in seeds and seedlings. *The Plant Cell* **14**, S15-S45.
- Forman M, Jensen WA.** 1965. Respiration and Embryogenesis in Cotton. *Plant Physiology* **40**, 765-769.

- Ghaderi-Far F, Khavari F, Sohrabi B.** 2012. Lint yield and seed quality response of drip irrigated cotton under various levels of water. *International Journal of Plant Production* **6**.
- Hay FR, Valdez R, Lee JS, Sta Cruz PC.** 2019. Seed longevity phenotyping: recommendations on research methodology. *Journal of Experimental Botany* **70**, 425-434.
- Hu W, Chen M-l, Wenqing Z, Chen B-l, Wang Y-h, Wang S-s, Meng Y-l, Zhou Z-g.** 2017. The effects of sowing date on cottonseed properties at different fruiting-branch positions. *Journal of Integrative Agriculture* **16**, 1322-1330.
- Jaspers P, Blomster T, Brosché M, Salojärvi J, Ahlfors R, Vainonen JP, Reddy RA, Immink R, Angenent G, Turck F, Overmyer K, Kangasjärvi J.** 2009. Unequally redundant RCD1 and SRO1 mediate stress and developmental responses and interact with transcription factors. *The Plant Journal* **60**, 268-279.
- Jing-bao L, Zhi-yuan F, Hui-ling X, Yan-min H, Zong-hua L, Liu-jing D, Shang-zhong X, Ji-hua T.** 2011. Identification of QTLs for maize seed vigor at three stages of seed maturity using a RIL population. *Euphytica* **178**, 127-135.
- K R.** 2007. Effect of seed treatments on viability and vigour of cotton seeds (*Gossypium hirsutum* L.) under ambient storage. *Journal of Cotton Research and Development* **31**, 1-6.
- Katiyar-Agarwal S, Zhu J, Kim K, Agarwal M, Fu X, Huang A, Zhu JK.** 2006. The plasma membrane Na<sup>+</sup>/H<sup>+</sup> antiporter SOS1 interacts with RCD1 and functions in oxidative stress tolerance in Arabidopsis. *Proceeding of National Academy of Science U S A* **103**, 18816-18821.
- Koornneef M, Bentsink L, Hilhorst H.** 2002. Seed dormancy and germination. *Current opinion in plant biology* **5**, 33-36.
- Kotak S, Vierling E, Bäumlein H, von Koskull-Döring P.** 2007. A novel transcriptional cascade regulating expression of heat stress proteins during seed development of Arabidopsis. *The Plant cell* **19**, 182-195.
- Kumar S, Stecher G, Tamura K.** 2016. MEGA7: Molecular Evolutionary Genetics Analysis Version 7.0 for Bigger Datasets. *Molecular Biology and Evolution* **33**, 1870-1874.
- Lata C, Prasad M.** 2011. Role of DREB in regulation of abiotic stress response in plants. *Journal of experimental botany* **62**, 4731-4748.
- Liu J, Meng Y, Chen J, Lv F, Ma Y, Chen B, Wang Y, Zhou Z, Oosterhuis DM.** 2015. Effect of late planting and shading on cotton yield and fiber quality formation. *Field Crops Research* **183**, 1-13.

**Liu Q, Kasuga M, Sakuma Y, Abe H, Miura S, Yamaguchi-Shinozaki K, Shinozaki K.** 1998. Two transcription factors, DREB1 and DREB2, with an EREBP/AP2 DNA binding domain separate two cellular signal transduction pathways in drought- and low-temperature-responsive gene expression, respectively, in *Arabidopsis*. *The Plant cell* **10**, 1391-1406.

**Liu X, Zhang H, Zhao Y, Feng Z, Li Q, Yang HQ, Luan S, Li J, He ZH.** 2013. Auxin controls seed dormancy through stimulation of abscisic acid signaling by inducing ARF-mediated ABI3 activation in *Arabidopsis*. *Proceeding of National Academy of Science U S A* **110**, 15485-15490.

**Lovegrove A, Hooley R.** 2000. Gibberellin and abscisic acid signalling in aleurone. *Trends in Plant Science* **5**, 102-110.

**Marcos-Filho J.** 2015. Seed vigor testing: An overview of the past, present and future perspective. *Scientia Agricola* **72**, 363-374.

**Matilla AJ, Carrillo-Barral N, Rodríguez-Gacio MdC.** 2015. An Update on the Role of NCED and CYP707A ABA Metabolism Genes in Seed Dormancy Induction and the Response to After-Ripening and Nitrate. *Journal of Plant Growth Regulation* **34**, 274-293.

**Miao Y, Lv D, Wang P, Wang X-C, Chen J, Miao C, Song C-P.** 2006. An *Arabidopsis* glutathione peroxidase functions as both a redox transducer and a scavenger in abscisic acid and drought stress responses. *The Plant cell* **18**, 2749-2766.

**Nakashima K, Shinwari ZK, Sakuma Y, Seki M, Miura S, Shinozaki K, Yamaguchi-Shinozaki K.** 2000. Organization and expression of two *Arabidopsis* DREB2 genes encoding DRE-binding proteins involved in dehydration- and high-salinity-responsive gene expression. *Plant Molecular Biology* **42**, 657-665.

**Nakashima K, Yamaguchi-Shinozaki K.** 2010. Promoters and Transcription Factors in Abiotic Stress-Responsive Gene Expression. In: Pareek A, Sopory SK, Bohnert HJ, eds. *Abiotic Stress Adaptation in Plants: Physiological, Molecular and Genomic Foundation*. Dordrecht: Springer Netherlands, 199-216.

**Nambara E, Okamoto M, Tatematsu K, Yano R, Seo M, Kamiya Y.** 2010. Abscisic acid and the control of seed dormancy and germination. *Seed Science Research* **20**.

**Okamoto JK, Caster B, Villarreal R, Van Montagu M, Jofuku KD.** 1997. The AP2 domain of APETALA2 defines a large new family of DNA binding proteins in *Arabidopsis*. *Proceeding of National Academy of Science U S A* **94**, 7076-7081.

- Ooms J, Leon-Kloosterziel KM, Bartels D, Koornneef M, Karssen CM.** 1993. Acquisition of Desiccation Tolerance and Longevity in Seeds of *Arabidopsis thaliana* (A Comparative Study Using Abscisic Acid-Insensitive *abi3* Mutants). *Plant Physiology* **102**, 1185-1191.
- Oracz K, Bouteau HE-M, Farrant JM, Cooper K, Belghazi M, Job C, Job D, Corbineau F, Bailly C.** 2007. ROS production and protein oxidation as a novel mechanism for seed dormancy alleviation. *The Plant Journal* **50**, 452-465.
- Pettigrew W, Dowd M.** 2011. Varying Planting Dates or Irrigation Regimes Alters Cottonseed Composition. *Crop Science* **51**, 2155.
- Qanmber G, Ali F, Lu L, Mo H, Ma S, Wang Z, Yang Z.** 2019a. Identification of Histone H3 (HH3) Genes in *Gossypium hirsutum* Revealed Diverse Expression During Ovule Development and Stress Responses. *Genes* **10**, 355.
- Qanmber G, Liu J, Yu D, Liu Z, Lu L, Mo H, Ma S, Wang Z, Yang Z.** 2019b. Genome-Wide Identification and Characterization of the PERK Gene Family in *Gossypium hirsutum* Reveals Gene Duplication and Functional Divergence. *International journal of molecular sciences* **20**, 1750.
- Qanmber G, Lu L, Liu Z, Yu D, Zhou K, Huo P, Li F, Yang Z.** 2019c. Genome-wide identification of GhAAI genes reveals that GhAAI66 triggers a phase transition to induce early flowering. *Journal of Experimental Botany*.
- Qanmber G, Yu D, Li J, Wang L, Ma S, Lu L, Yang Z, Li F.** 2018. Genome-wide identification and expression analysis of *Gossypium* RING-H2 finger E3 ligase genes revealed their roles in fiber development, and phytohormone and abiotic stress responses. *Journal of Cotton Research* **1**, 1.
- Rajjou L, Lovigny Y, Groot SPC, Belghazi M, Job C, Job D.** 2008. Proteome-Wide Characterization of Seed Aging in *Arabidopsis*: A Comparison between Artificial and Natural Aging Protocols. *Plant Physiology* **148**, 620-641.
- Ravindran P, Verma V, Stamm P, Kumar PP.** 2017. A Novel RGL2-DOF6 Complex Contributes to Primary Seed Dormancy in *Arabidopsis thaliana* by Regulating a GATA Transcription Factor. *Molecular Plant* **10**, 1307-1320.
- Razem FA, Baron K, Hill RD.** 2006. Turning on gibberellin and abscisic acid signaling. *Current Opinion in Plant Biology* **9**, 454-459.

- Sakuma Y, Liu Q, Dubouzet JG, Abe H, Shinozaki K, Yamaguchi-Shinozaki K.** 2002. DNA-Binding Specificity of the ERF/AP2 Domain of Arabidopsis DREBs, Transcription Factors Involved in Dehydration- and Cold-Inducible Gene Expression. *Biochemical and Biophysical Research Communications* **290**, 998-1009.
- Sano N, Rajjou L, North HM, Debeaujon I, Marion-Poll A, Seo M.** 2016. Staying Alive: Molecular Aspects of Seed Longevity. *Plant & cell physiology* **57**, 660-674.
- Shapiguzov A, Vainonen JP, Hunter K, Tossavainen H, Tiwari A, Järvi S, Hellman M, Aarabi F, Alseekh S, Wybouw B, Van Der Kelen K, Nikkanen L, Krasensky-Wrzaczek J, Sipari N, Keinänen M, Tyystjärvi E, Rintamäki E, De Rybel B, Salojärvi J, Van Breusegem F, Fernie AR, Brosché M, Permi P, Aro E-M, Wrzaczek M, Kangasjärvi J.** 2019. Arabidopsis RCD1 coordinates chloroplast and mitochondrial functions through interaction with ANAC transcription factors. *eLife* **8**, e43284.
- Shu K, Zhang H, Wang S, Chen M, Wu Y, Tang S, Liu C, Feng Y, Cao X, Xie Q.** 2013. ABI4 regulates primary seed dormancy by regulating the biogenesis of abscisic acid and gibberellins in arabidopsis. *PLoS Genet* **9**, e1003577.
- Smith CW.** 1995. *Crop production: evolution, history, and technology*. New York: John Wiley and Sons.
- Sugliani M, Rajjou L, Clercx EJM, Koornneef M, Soppe WJJ.** 2009. Natural modifiers of seed longevity in the Arabidopsis mutants abscisic acid insensitive3-5 (*abi3-5*) and leafy cotyledon1-3 (*lec1-3*). *New Phytologist* **184**, 898-908.
- Sun TP.** 2008. Gibberellin metabolism, perception and signaling pathways in Arabidopsis. *Arabidopsis Book* **6**, e0103.
- Tejedor-Cano J, Prieto-Dapena P, Almoguera C, Carranco R, Hiratsu K, Ohme-Takagi M, Jordano J.** 2010. Loss of function of the HSFA9 seed longevity program. *Plant, Cell & Environment* **33**, 1408-1417.
- Turley R, Chapman K.** 2009. Ontogeny of Cotton Seeds: Gametogenesis, Embryogenesis, Germination, and Seedling Growth. 332-341.
- Verma P, Kaur H, Petla BP, Rao V, Saxena SC, Majee M.** 2013. PROTEIN L-ISOASPARTYL METHYLTRANSFERASE2 is differentially expressed in chickpea and enhances seed vigor and longevity by reducing abnormal isoaspartyl accumulation predominantly in seed nuclear proteins. *Plant Physiology* **161**, 1141-1157.



**Wan Q, Guan X, Yang N, Wu H, Pan M, Liu B, Fang L, Yang S, Hu Y, Ye W, Zhang H, Ma P, Chen J, Wang Q, Mei G, Cai C, Yang D, Wang J, Guo W, Zhang W, Chen X, Zhang T.** 2016. Small interfering RNAs from bidirectional transcripts of GhMML3\_A12 regulate cotton fiber development. *New Phytologist* **210**, 1298-1310.

**Wang Z, Cao H, Sun Y, Li X, Chen F, Carles A, Li Y, Ding M, Zhang C, Deng X, Soppe WJ, Liu YX.** 2013. Arabidopsis paired amphipathic helix proteins SNL1 and SNL2 redundantly regulate primary seed dormancy via abscisic acid-ethylene antagonism mediated by histone deacetylation. *The Plant Cell* **25**, 149-166.

**Weigel D.** 1995. The APETALA2 domain is related to a novel type of DNA binding domain. *The Plant cell* **7**, 388-389.

**Wu Z, Liang J, Zhang S, Zhang B, Zhao Q, Li G, Yang X, Wang C, He J, Yi M.** 2018. A Canonical DREB2-Type Transcription Factor in Lily Is Post-translationally Regulated and Mediates Heat Stress Response. *Frontier in Plant Science* **9**, 243.

**Yamaguchi S, Kamiya Y, Nambara E.** 2007. Regulation of ABA and GA Levels During Seed Development and Germination in Arabidopsis. 224-247.

**Yang Z, Ge X, Yang Z, Qin W, Sun G.** 2019. Extensive intraspecific gene order and gene structural variations in upland cotton cultivars. **10**, 2989.

**Yang Z, Zhang C, Yang X, Liu K, Wu Z, Zhang X, Zheng W, Xun Q, Liu C, Lu L, Qian Y, Xu Z, Li C, Li J, Li F.** 2014. PAG1, a cotton brassinosteroid catabolism gene, modulates fiber elongation. *New Phytologist* **203**, 437-448.

**Zheng L, Wu H, Qanmber G, Ali F, Wang L, Liu Z, Yu D, Wang Q, Xu A, Yang Z.** 2020. Genome-Wide Study of the GATL Gene Family in *Gossypium hirsutum* L. Reveals that GhGATL Genes Act on Pectin Synthesis to Regulate Plant Growth and Fiber Elongation. *Genes (Basel)* **11**.

## **Supporting Information**

Supplementary data are available at *JXB* online.

**Table S1:** Information related mutants that are used in the study.

**Table S2:** Primers for mutants screening, qPCR, and amplification of coding regions and promoters of genes used in the study.

**Fig. S1:** Identification of *dreb2b* null mutant and its seed germination and vigor phenotype verification.

**Fig. S2:** *DREB2B* is induced by ABA to involve in seed vigor regulation.

**Fig. S3:** Protein and promoter sequences analysis of *DREB2B* and *GhDREB2B-A09*.

**Fig. S4:** Expression of *DREB2B* and *GhDREB2B-A09* in over-expression lines and determination of seed germination and vigor of WT, *dreb2b* mutant, and complementary lines, *35S:DREB2B* and *35S:GhDREB2B-A09* lines.

**Fig. S5:** Protein sequence analysis of *RCD1*s in Arabidopsis and cotton.

**Fig. S6:** Expression analysis of *DREB2B*, *ABI3*, *RCD1*, and *SRO1* in different lines and response to ABA.

## Figure Legends

**Fig. 1.** Phenotypic analysis of *dreb2b* in seed germination and vigor (A) Seed germination and vigor analysis of *dreb2b* mutant and WT after different months of dry storage at room temperature. The seed germination rate of *dreb2b* mutant and WT was calculated at 7 days after imbibition followed stratification. (B) Germinating seeds images of WT and *dreb2b* were taken at 84 and 168 hours after imbibition followed stratification. (C) *dreb2b* mutant and WT seed germination speed after different hour's interval was calculated from 2 weeks old seeds harvested at the same time. (D) Seed germination images of WT and *dreb2b* with 3 day CDT or without CDT were taken at 7 days after imbibition with stereo-microscope. (E, F) WT and *dreb2b* seed germination rate treated with 3 days CDT or without CDT treatment was calculated with different day's interval after imbibition. (G) Tetrazolium staining photos of WT and *dreb2b* mutant seeds. Tetrazolium staining was performed with and without CDT treated seeds. (H) Viable seed ratios of WT and *dreb2b* were evaluated by examining the tetrazolium staining pattern and color intensity. (B, D, G) For each genotype, 80-100 seeds were used. Bars, 500 $\mu$ m. (C, E, F) Experiments were performed in three replicates and germination ratio was measured from averages of three replicates with 100 seeds per replicate from independent lines of each genotype. Error bars indicate SD based on three biological replicates. Asterisks over the bars

indicate a significance level among means determined by the student's T-test (\* $P \leq 0.05$ , \*\* $P \leq 0.01$ , \*\*\* $P \leq 0.001$ ).

**Fig. 2:** *DREB2B* regulated the seed germination and vigor through the ABA pathway. (A) Seed germination test of WT and *dreb2b* under ABA treatments. Freshly harvested seeds were soaked in distilled water with (0.025, 0.05, 0.1, and 0.5) or without ABA (Mock). The germination rate was counted at 7 days after imbibition followed stratification. (B) mRNA level of genes involved in ABA pathway in freshly harvested *dreb2b* mutant and WT dry seeds. Error bars indicate SD based on three biological replicates. Asterisks over the bars indicate a significance level among means determined by the student's T-test (\* $P \leq 0.05$ , \*\* $P \leq 0.01$ , \*\*\* $P \leq 0.001$ ). (C) Microscopic images of WT, *dreb2b*, *abi3-16* mutants, and *dreb2b/abi3-16* double mutant seeds showing germination speed were taken at 84, 96 and 168 hours after imbibition followed stratification. (D) WT, *dreb2b*, *abi3-16* mutants, and *dreb2b/abi3-16* double mutant seed germination after different hour intervals were observed and calculated from fresh seeds harvested 2 weeks before the experiment. (E) Images of WT, *dreb2b*, *abi3-16* mutants, and *dreb2b/abi3-16* double mutant with 0, 3, 5, and 7 days CDT were taken at 7 days after imbibition with stereo-microscope. (F) WT, *dreb2b*, *abi3-16*, and *dreb2b/abi3-16* double mutant seeds were treated with 0, 3, 5, and 7 days CDT, and the germination ratio of treated seeds was calculated at 0, 3, 5, and 7 days after imbibition. (G) Photos of WT, *dreb2b*, *abi3-16* mutants, and *dreb2b/abi3-16* double mutant seeds stained by tetrazolium after 0, 3, 5, and 7 days CDT treatments were taken with stereo-microscope. For each genotype, 80-100 seeds were used. Bars, 500 $\mu\text{m}$ . (H) Viable seed ratio of WT, *dreb2b*, *abi3-16* mutants, and *dreb2b/abi3-16* double mutant treated with 0, 3, 5, and 7 days CDT were calculated by examining the tetrazolium staining pattern and color intensity. (C, E) For each genotype, 80-100 seeds were used. Bars, 1mm. (A, D, F, H) Experiments were performed in three replicates and germination ratio was measured from averages of three replicates with 100 seeds per replicate from independent lines of each genotype. Error bars indicate SD based on three biological replicates. Asterisks over the bars indicate a significance level among means determined by the student's T-test (\* $P \leq 0.05$ , \*\* $P \leq 0.01$ , \*\*\* $P \leq 0.001$ ).

**Fig. 3:** Expression and transcription activity analysis of *DREB2B* and Gh*DREB2B-A09* transcription factor. (A) Phylogenetic analysis of *DREB2B* and its homologous proteins. Phylogenetic tree of *DREB2B* homolog transcription factors in *G. arboreum*, *G. hirsutum*, *G. barbadense*, *G. raimondii*, *Z. may*, and *O. sativa*. The neighbor-joining tree based on multiple

sequences alignment was built to show the relationships among DREB2B proteins from seven other plant species. (B, C) Determination of mRNA level of *DREB2B* and *GhDREB2B-A09* in different developmental tissues of *Arabidopsis* and cotton respectively. (D) Determination of mRNA level of *DREB2B* and *GhDREB2B-A09* in imbibed seeds of *Arabidopsis* and cotton collected at different time intervals. (B-D) Error bars represent the standard deviations of three independent experiments. (E) Transcriptional activity of DREB2B and GhDREB2B-A09 was determined by a yeast assay approach. 10 and 100 times diluted culture with absolute culture was spread on three different types of plates. The growth of yeast cells on SD/-Trp, SD/-Trp-His, and SD/-Trp-His+  $\beta$ -galactosidase medium was analyzed. pAS2 (an empty vector) was used as a negative control. (F) the  $\beta$ -galactosidase activity of pAS2-DREB2B and pAS2-GhDREB2B-A09.  $\beta$ -galactosidase activity from yeast culture of pAS2-DREB2B and pAS2-DREB2B-A09 was calculated in Miller units represented at y-axis and the error bars denoted the standard deviations of three independent experiments.

**Fig. 4:** Sub-cellular and tissue level localization of *DREB2B* and *GhDREB2B-A09*. (A) GFP-DREB2B and GFP-GhDREB2B-A09 were transiently expressed in tobacco epidermal cells and green fluorescence (GFP) was observed with a confocal microscope. The images were presented bright field, fluorescence, and merge of bright field and fluorescence. (B, C) GFP-DREB2B and GFP-GhDREB2B-A09 with GFP was transformed in Col and stable expression of green fluorescence (GFP) was observed endogenously in the root and radical cells after 24 hours of imbibed of transgenic plants at T4 generation. The images were presented bright field, fluorescence, and merge of bright field and fluorescence. DAPI, 4,6-diamidino-2-phenylindole. (D-Y) *DREB2B* and *GhDREB2B-A09* promoter activity were determined by histochemical GUS staining. (D, O) Ten-day-old Seedlings, (E, P) shoot and root, (F, Q) Leaf, (G, R) Shoot and root initiation point, (I, S) Root, (H, T) Root tip, (J-L, U-W) anther, (N, X) petals, (M, Y) stigma. (A, B) Bars, 50  $\mu$ m. (C-Y) Bars, 500 $\mu$ m.

**Fig. 5:** Seed germination and vigor phenotype of WT, *dreb2b* mutant, and complementary lines (*35S:DREB2B/dreb2b*), *35S:DREB2B*, and *35S:GhDREB2B-A09* lines. (A) Germinating seeds microscopic images of WT, *dreb2b* mutant and complementary line, *35S:DREB2B* and *35S:GhDREB2B-A09* lines were taken at 84, 96 and 168 hours after imbibition followed stratification. For each genotype, 80-100 seeds were used. Bars, 500 $\mu$ m. (B) Seed germination after different hour intervals were observed and calculated for WT, *dreb2b* mutant,

complementary lines, *35S:DREB2B*, and *35S:GhDREB2B-A09* lines from fresh seeds harvested 2 weeks before the experiment. (C) Seed germination images of WT, *dreb2b* mutant, and complementary lines, *35S:DREB2B* and *35S:GhDREB2B-A09* lines treated with or without CDT treatment. Images were taken 7 days after imbibition with stereo-microscope. Bars, 500 $\mu$ m. (D, E) WT, *dreb2b* mutant and complementary lines, *35S:DREB2B* and *35S:GhDREB2B-A09* lines seeds germination ratio treated with 3 days and without CDT was calculated at different time points. (B, D, and E) Experiments were performed in three replicates and germination ratio was measured from averages of three replicates with about 100 seeds per replicate from independent lines of each genotype. Error bars indicate SD based on three biological replicates. Asterisks over the bars indicate a significance level among means determined by the student's T-test (\* $P \leq 0.05$ , \*\* $P \leq 0.01$ , \*\*\* $P \leq 0.001$ ).

**Fig. 6:** Interaction between DREB2B and the member of RCD1 family proteins in cotton and *Arabidopsis* and the expression profiles of *RCD1* family genes in cotton and *Arabidopsis*. (A) Bimolecular fluorescence complementation (BiFC) for interactions between RCD1, SRO1 and DREB2B. For BiFC assays, *Nicotiana benthamiana* leaves were co-agro-infiltrated with constructs expressing *DREB2B* fused to the N- and *RCD1* or *SRO1* fused to the C-terminus half of YFP. *RCD1* showed strong interaction with *DREB2B* in the cytoplasm while *SRO1* in the nucleus. Bars, 50 $\mu$ m. (B) BiFC assay for interactions between *GhRCD1L* and *GhDREB2B-A09* was performed as described before. *GhRCD1L-A05*, *GhRCD1L-D05*, *GhRCD1L-A08*, *GhRCD1L-A12*, and *GhRCD1L-D12* showed strong interaction with *GhDREB2B-A09* in the cytoplasm. The reconstructed YFP fluorescence was recorded 72h post agroinfiltration by confocal microscopy. Bars, 50 $\mu$ m. (C, E and F) mRNA level of *RCD1*, *SRO1*, and *GhRCD1L* in different developmental tissues of *Arabidopsis* and cotton. (D, G) mRNA level of *RCD1*, *SRO1*, and *GhRCD1L* in imbibed seeds of *Arabidopsis* and cotton collected at different time intervals. (C-G) Error bars represent the standard deviations of three independent experiments. *ACTIN2* and *GhHis3* genes were used as an internal control for *Arabidopsis* and cotton respectively.

**Fig. 7:** Phenotypic analysis of seed vigor of WT, *dreb2b*, *rcd1-3*, *sro1-1* and *sro1-2* (A) Seeds microscopic images of WT, *dreb2b*, *rcd1-3*, *sro1-1* and *sro1-2* showing germination speed were taken at 84, 96 and 168 hours after imbibition followed stratification. For each genotype, 80-100 seeds were used. Bars, 1mm. (B) Germination ratio after different hour intervals was observed and calculated for WT, *dreb2b*, *rcd1-3*, *sro1-1*, and *sro1-2* from fresh seeds harvested 2 weeks

before the experiment. (C) Images of WT, *dreb2b*, *rcd1-3*, *sro1-1*, and *sro1-2* seeds treated with or without CDT treatment were taken at 7 days after imbibition with stereo-microscope. For each genotype, 80-100 seeds were used. Bars, 1mm. (D, E) WT, *dreb2b*, *rcd1-3*, *sro1-1* and *sro1-2* seed germination ratio treated with 3 days and without CDT was calculated with different day's interval. (B, D, and E) For each genotype, three replicates with about 100 seeds per replicate were used and error bars represented averages  $\pm$  s.d. of three independent batches of seeds for each genotype. Asterisks over the bars indicate a significance level among means determined by the student's T-test (\* $P \leq 0.05$ , \*\* $P \leq 0.01$ , \*\*\* $P \leq 0.001$ ).

**Fig. 8:** Model of DREB2B function in seed vigor dependent and independent on ABI3 pathways. Previously identified seed vigor regulation pathway illustrated that ABI3 induced the expression of downstream transcription factor HsfA9 to improve seed vigor. Comparatively, in our study, DREB2B interacts and form a complex with RCD1s, meanwhile it partially induce the expression of *ABI3* and function synergistically with ABI3 in seed vigor regulation by activating some unfamiliar factors and pathways. In this model, ABI3 is involved in two antagonistic pathways, one is dependent on HsfA9 positively and another is dependent on an unclear pathway negatively, but the correlation and underlying mechanisms between these two pathways are blank. Anyway, both ABI3 and DREB2B associated pathways are activated by ABA in seed vigor regulation.



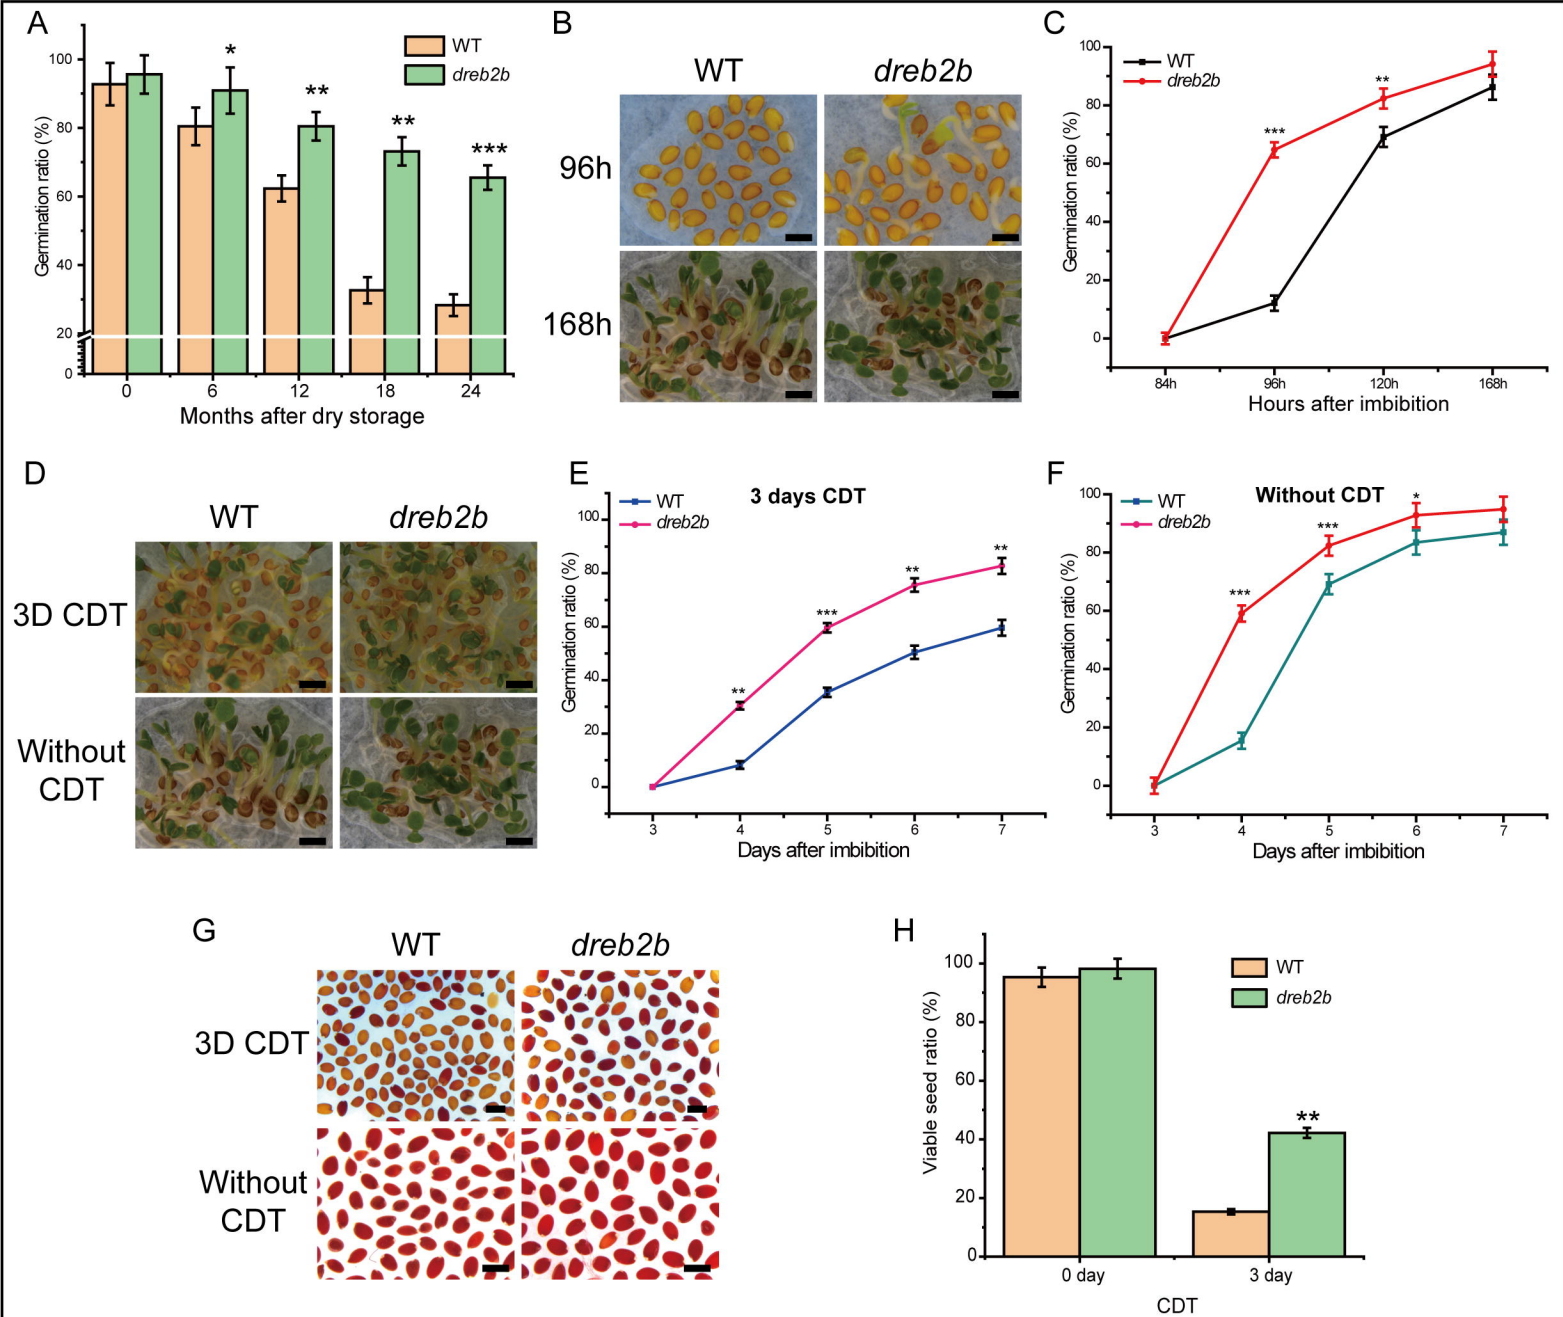

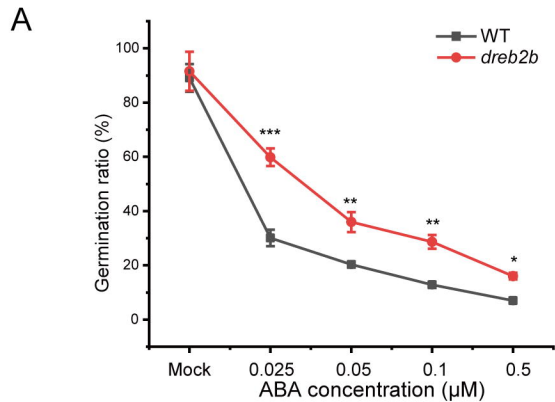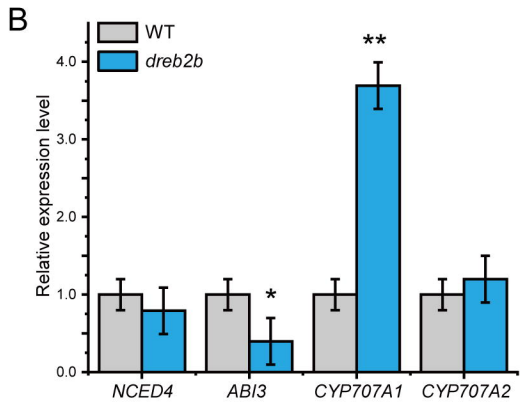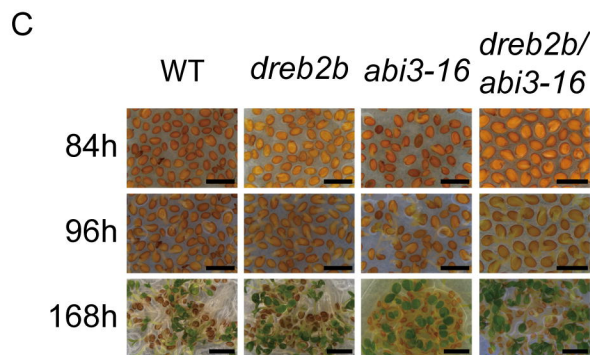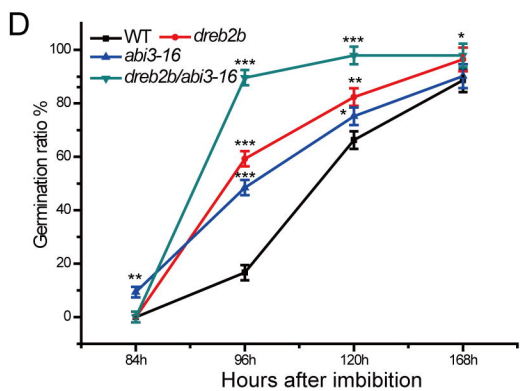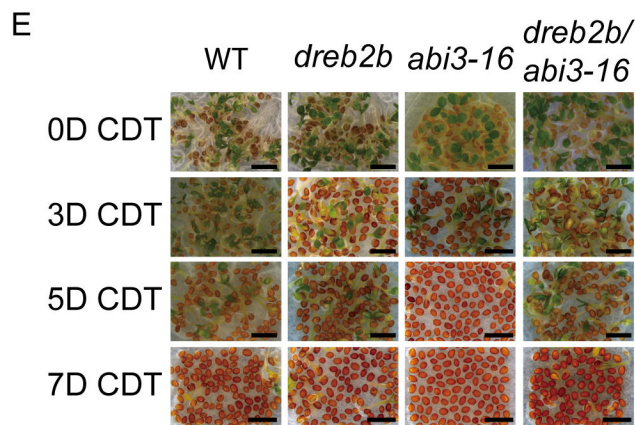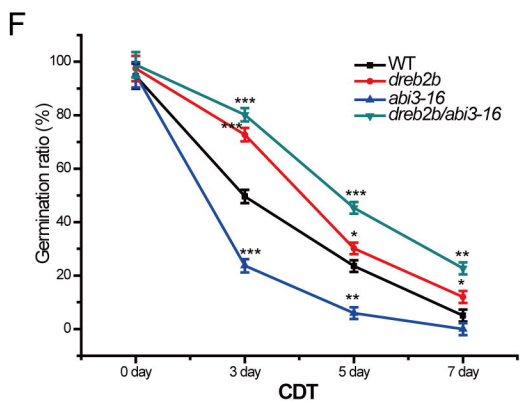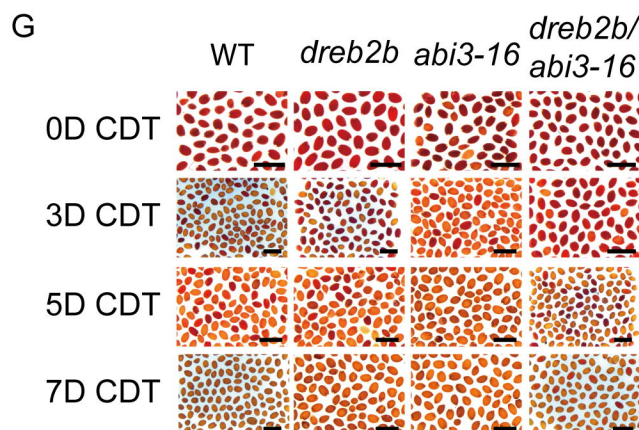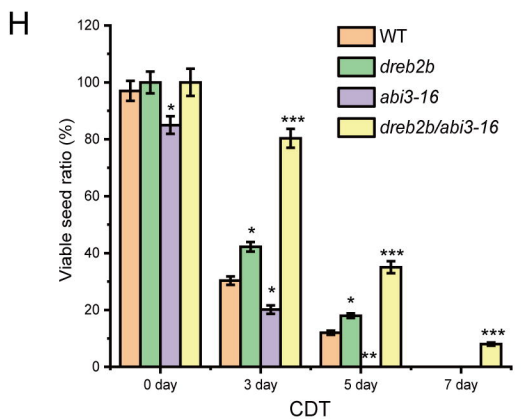

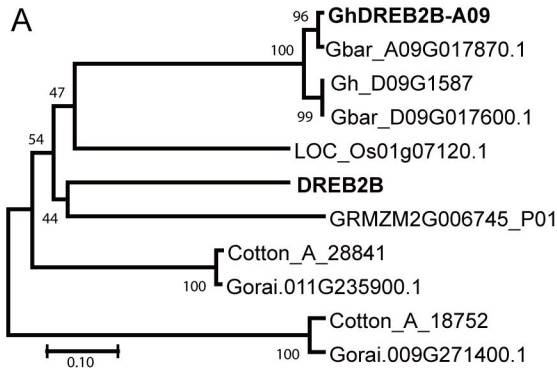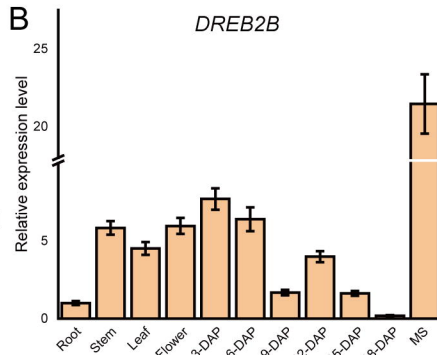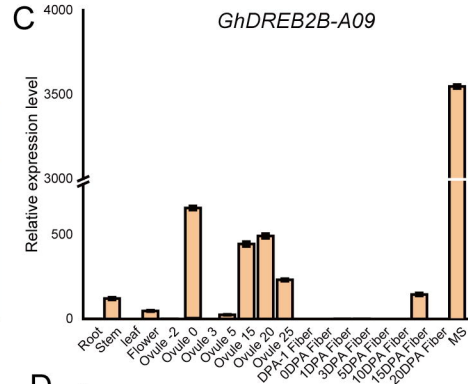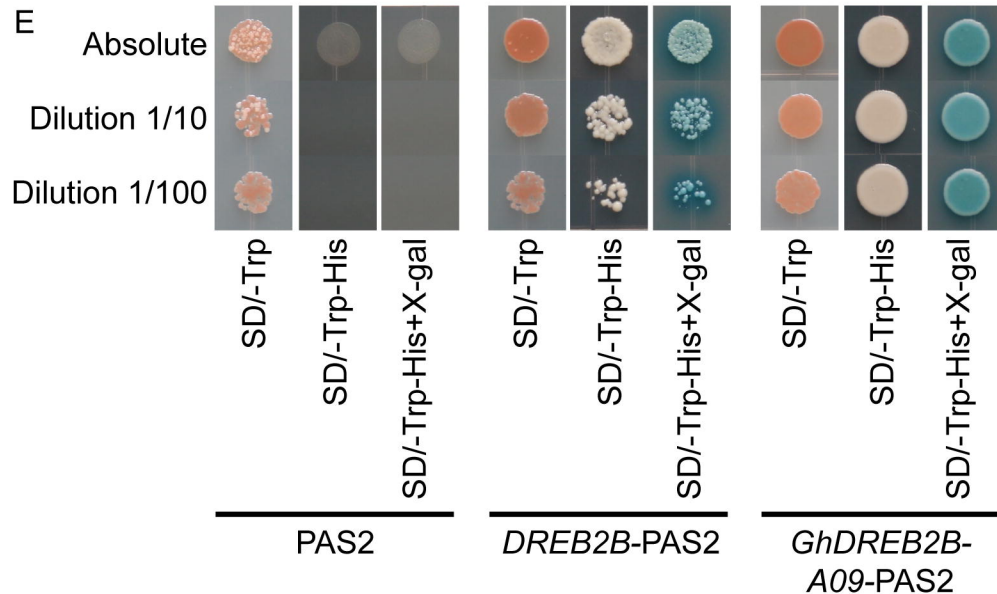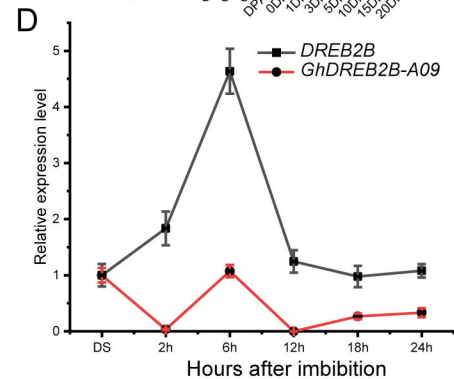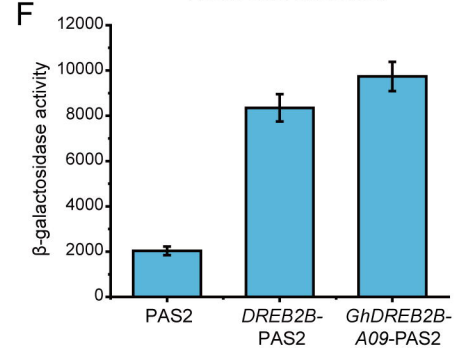



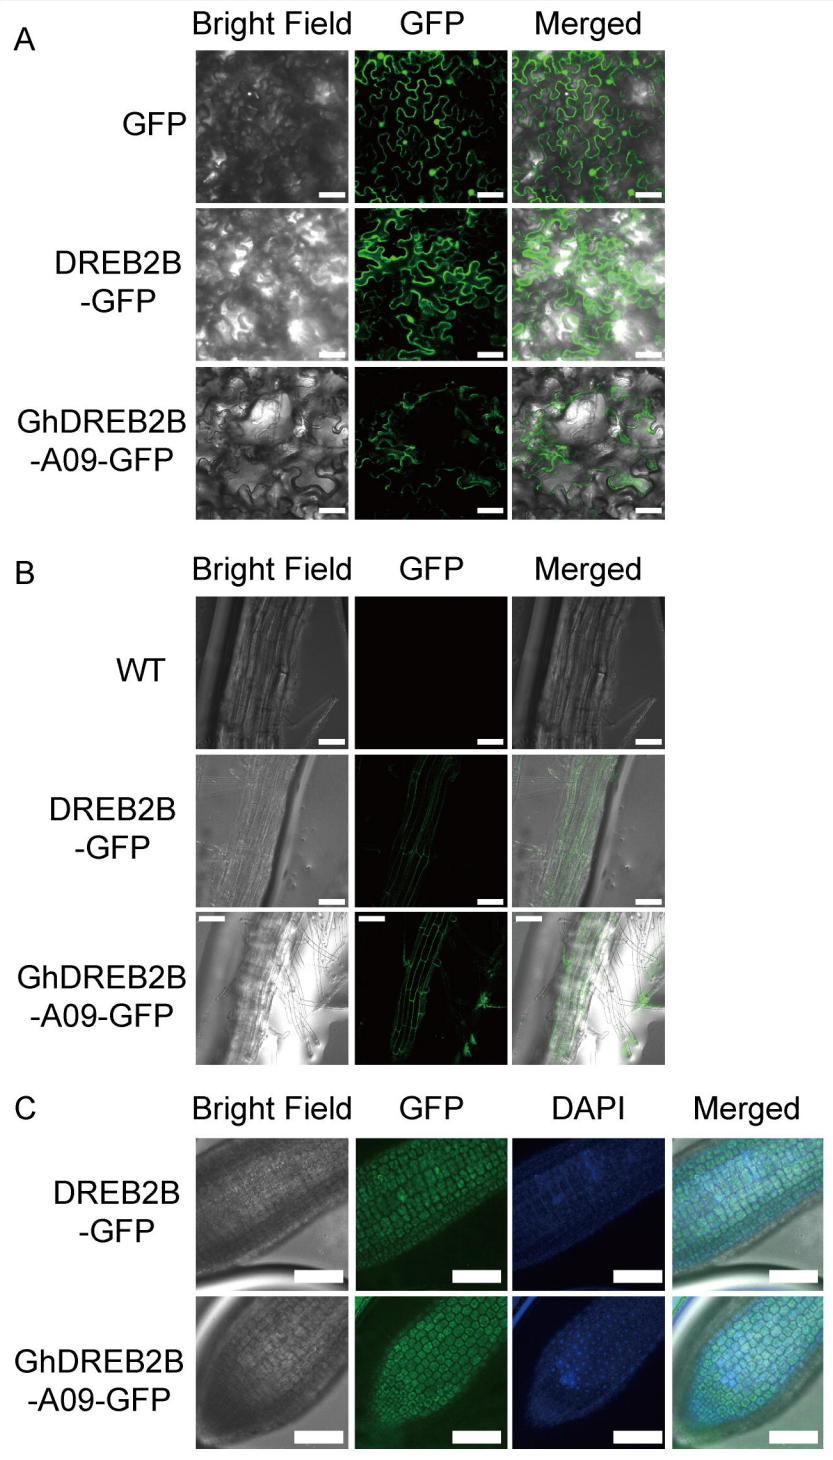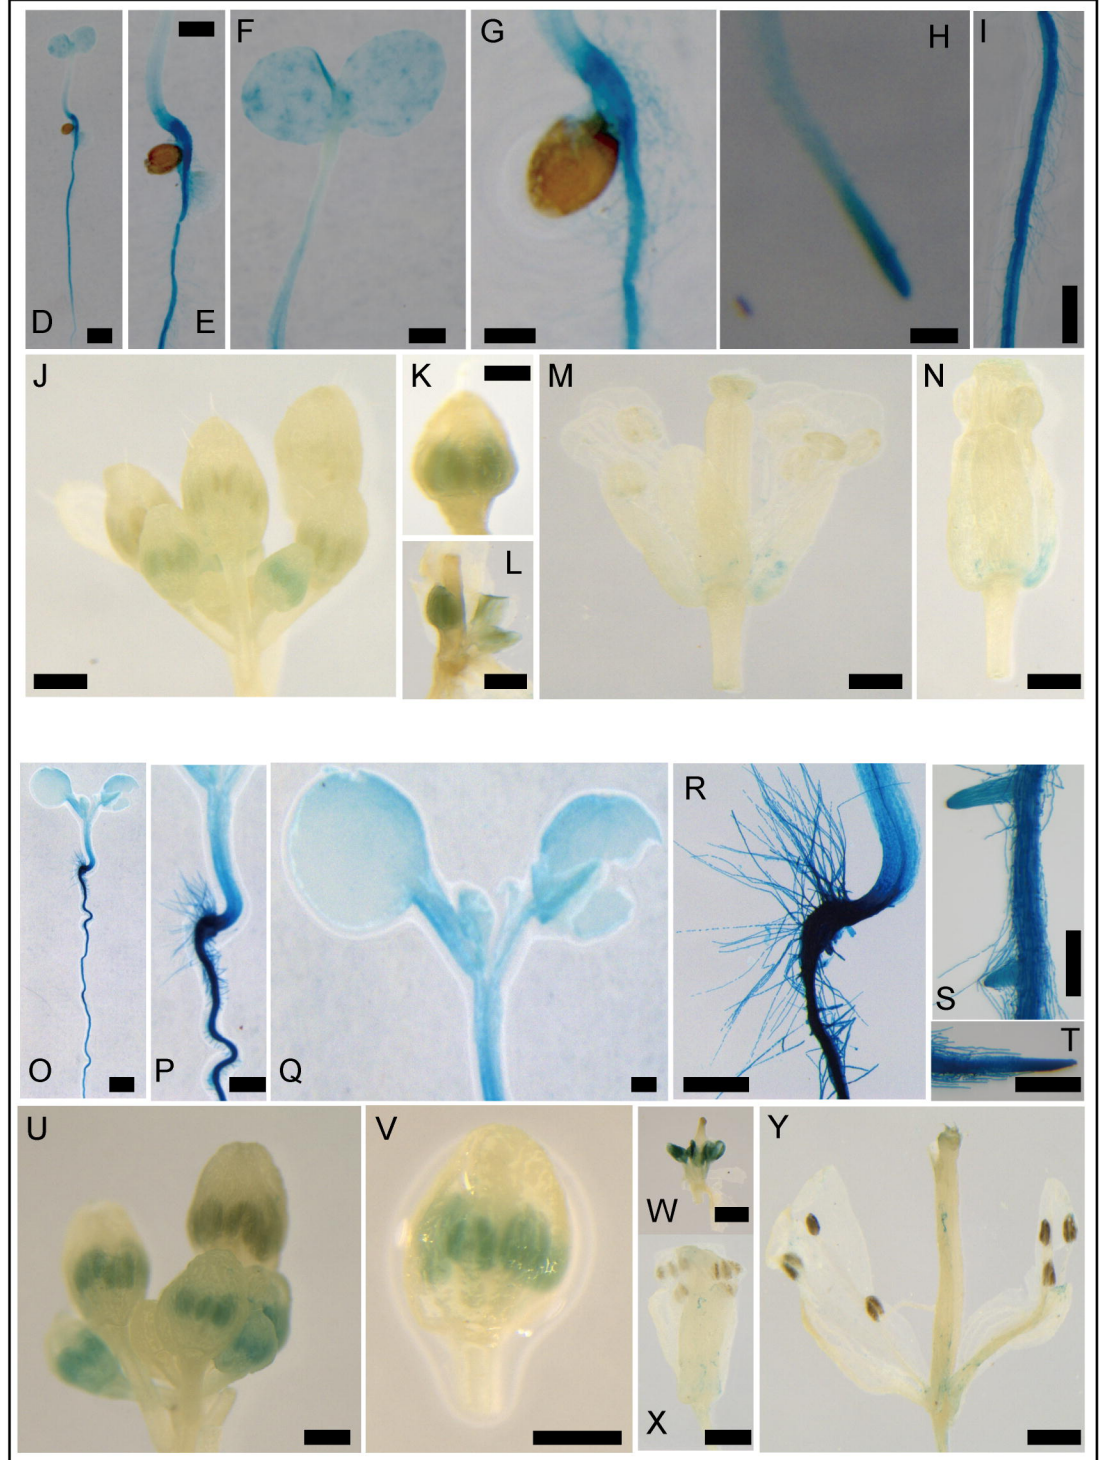

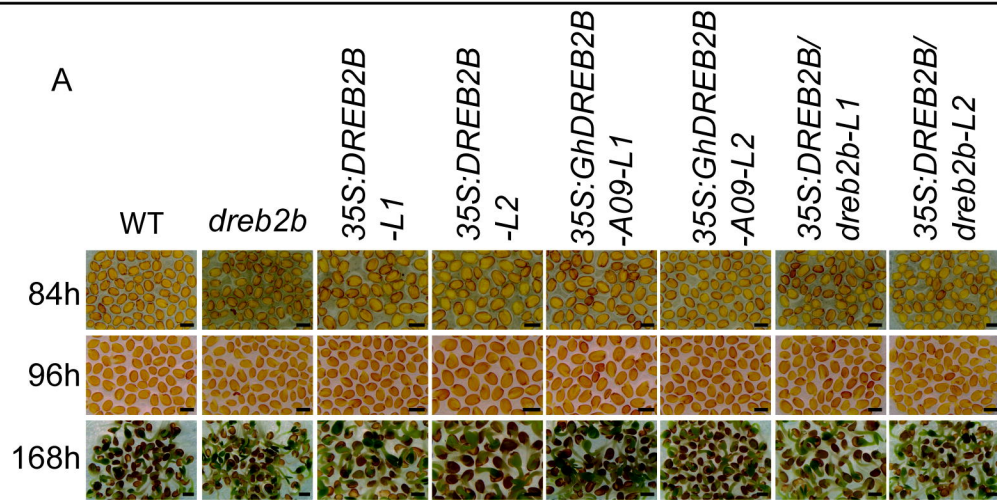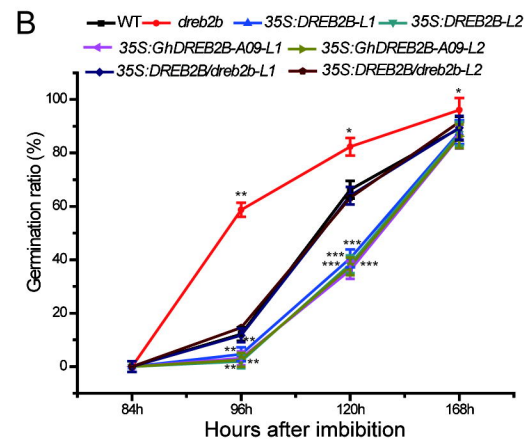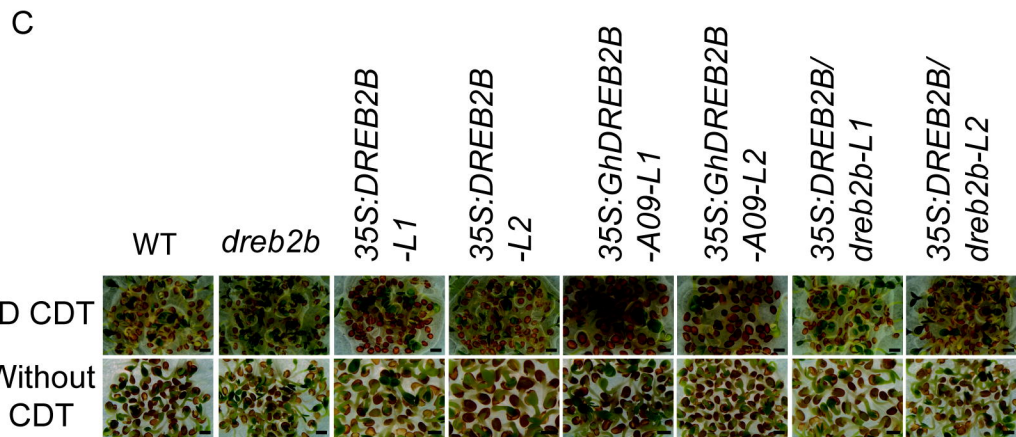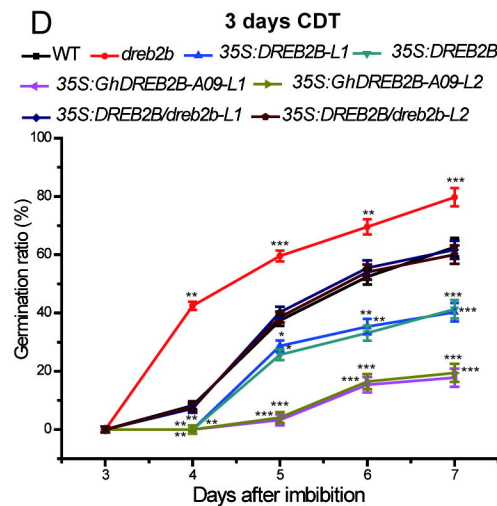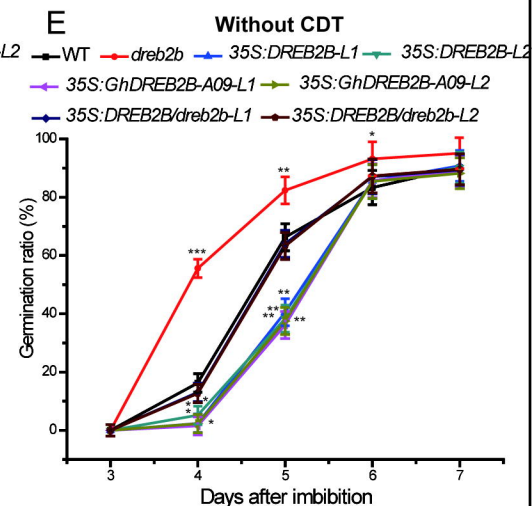



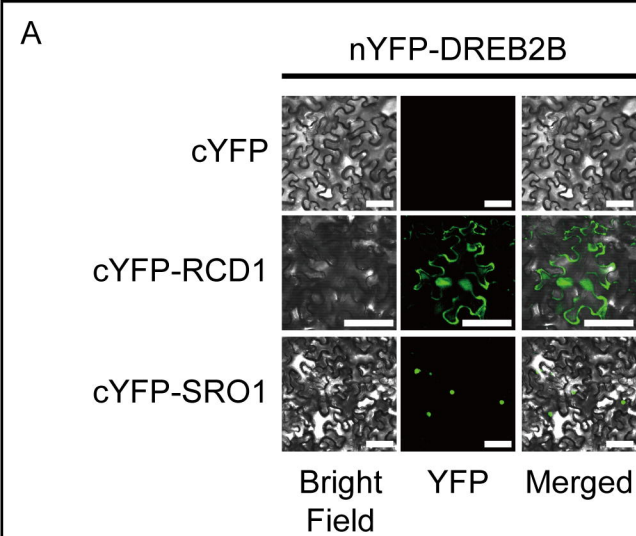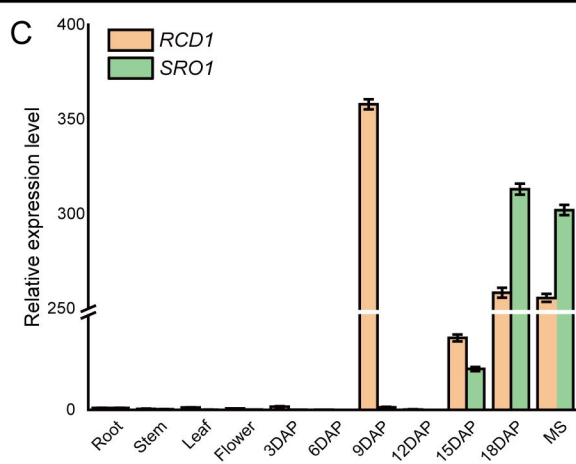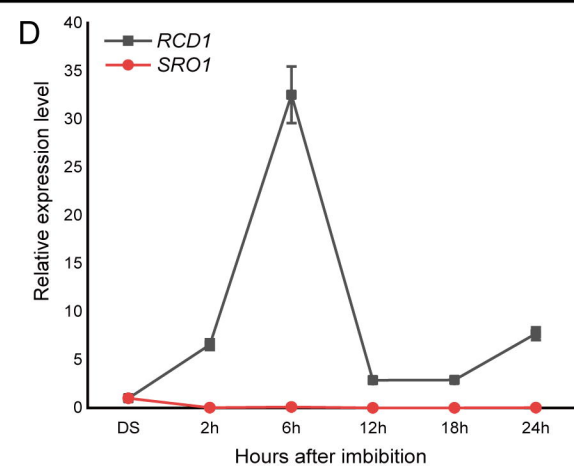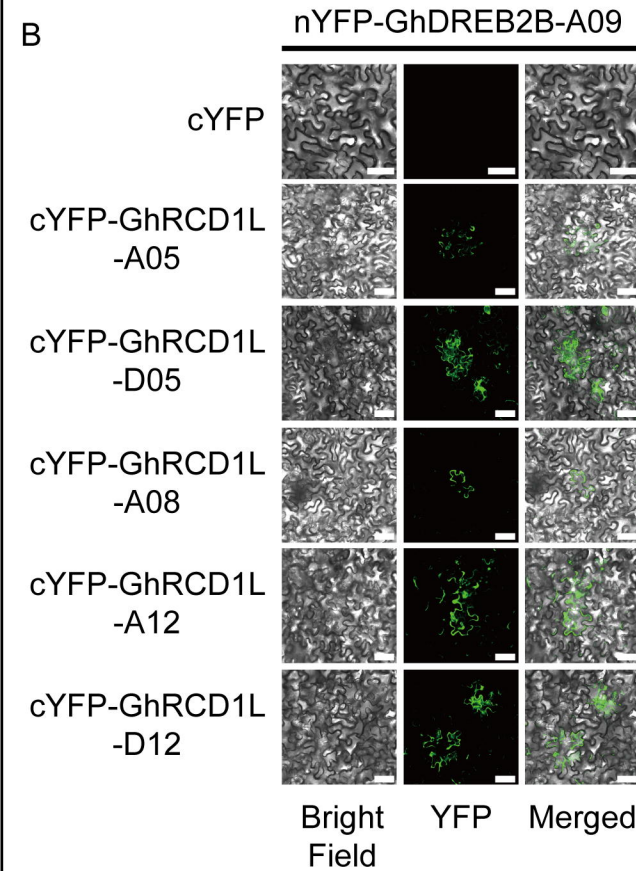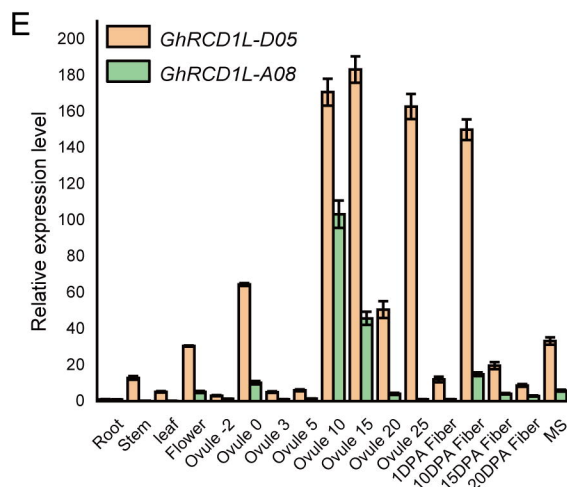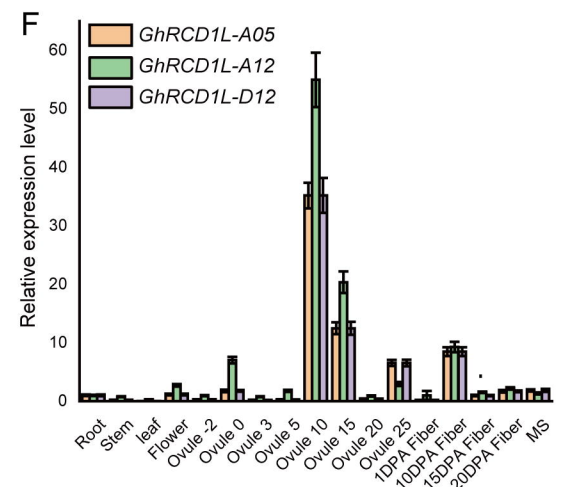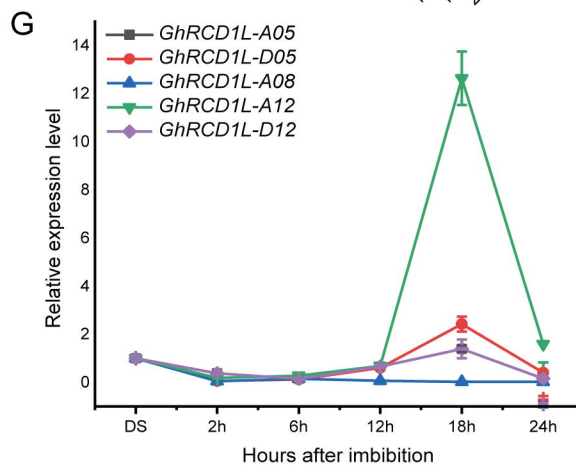



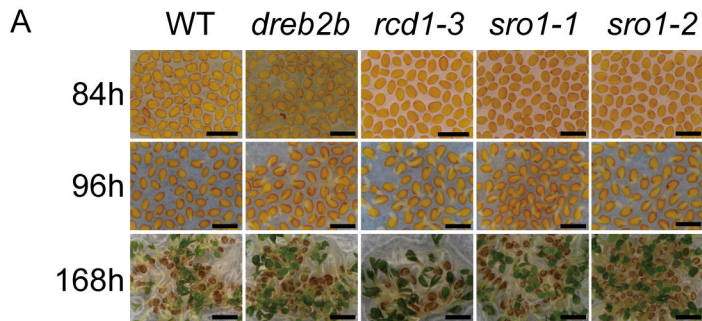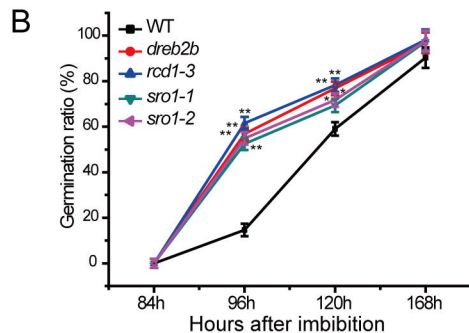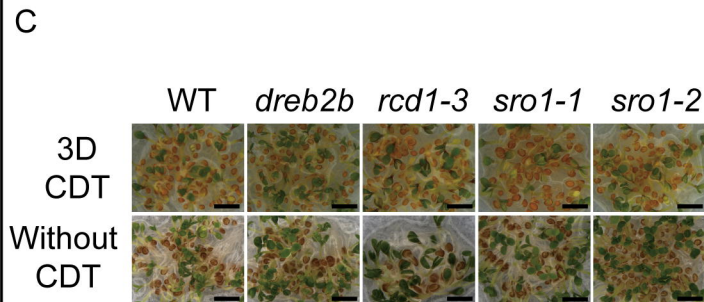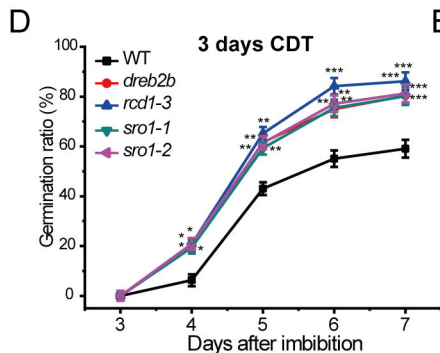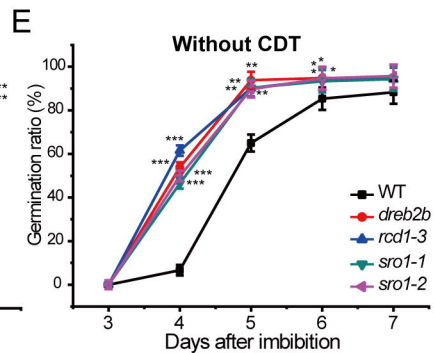

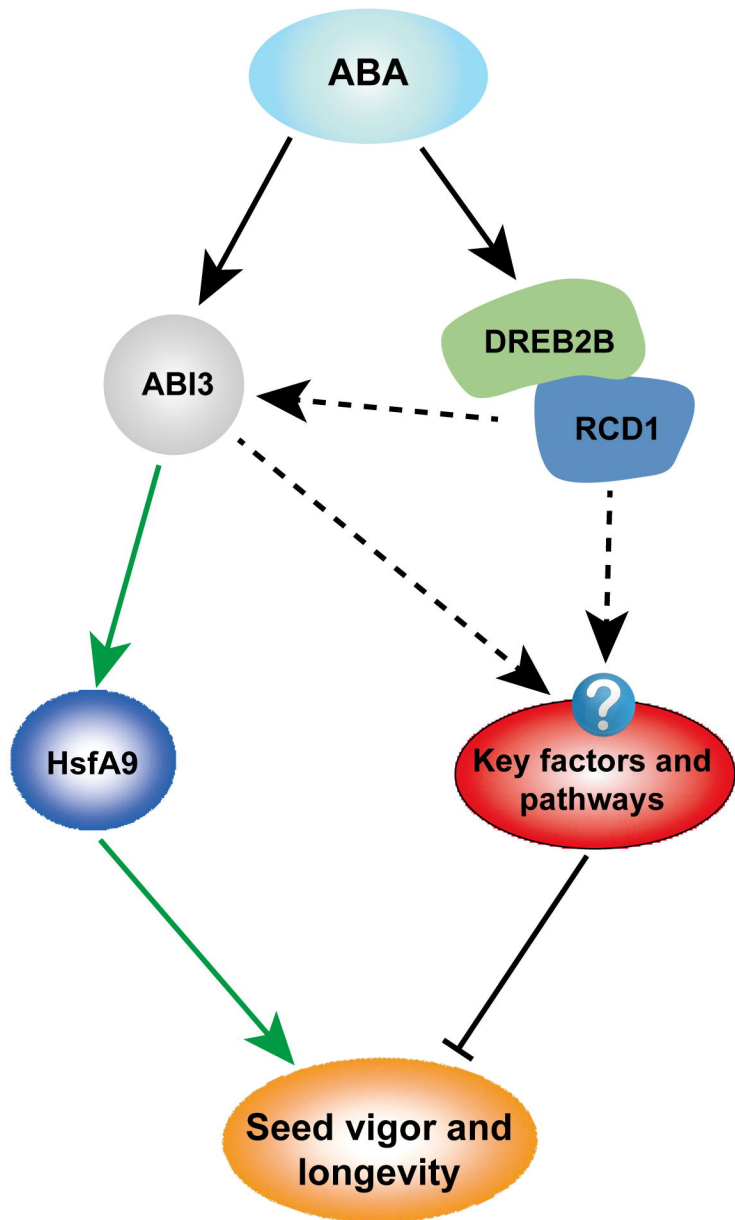

Source: http://biorxiv.org/content/10.1101/2020.12.09.418798v1.full.pdf
